1           Beta-glucanase replaces diet medication in broilers fed hullless barley diets

2

3

4           **Effects of exogenous  $\beta$ -glucanase on ileal digesta soluble  $\beta$ -glucan molecular weight,**

5 **digestive tract characteristics, and performance of coccidiosis challenged broiler chickens**

6 **fed hullless barley-based diets with and without medication**

7

8

9    Namalika D. Karunaratne<sup>1</sup>, Rex W. Newkirk<sup>1\*</sup>, Nancy P. Ames<sup>2</sup>, Andrew. G. Van Kessel<sup>1</sup>,

10   Michael R. Bedford<sup>3</sup>, Henry L. Classen<sup>1</sup>

11

12

13

14   <sup>1</sup>Department of Animal and Poultry Science, University of Saskatchewan, Saskatoon,  
15   Saskatchewan, Canada

16

17   <sup>2</sup>Agriculture and Agri-Food Canada, Winnipeg, Manitoba, Canada

18

19   <sup>3</sup>AB Vista, Marlborough, Wiltshire, United Kingdom

20

21

22   \*Corresponding author

23   E-mail: [rex.newkirk@usask.ca](mailto:rex.newkirk@usask.ca) (RWN)

## 25 **Abstract**

26           Limited use of medication in poultry feed led to the investigation of exogenous enzymes  
27 as antibiotic alternatives for controlling enteric disease. The objective of this study was to  
28 evaluate the effects of diet  $\beta$ -glucanase (BGase) and medication on  $\beta$ -glucan depolymerization,  
29 digestive tract characteristics, and performance of broilers. Broilers were fed hullless barley (HB)  
30 based diets with BGase (Econase GT 200P from AB Vista; 0 and 0.1%) and medication  
31 (Bacitracin and Salinomycin Na; with and without) arranged as a  $2 \times 2$  factorial. In Experiment  
32 1, 160 broilers were housed in cages from d 0 to 28. Each treatment was assigned to 10 cages. In  
33 Experiment 2, broilers (2376) were housed in floor pens and challenged with a coccidiosis  
34 vaccine on d 5. Each treatment was assigned to one floor pen in each of nine rooms. In  
35 Experiment 1, the soluble  $\beta$ -glucan weight average molecular weight (Mw) in the ileal digesta  
36 was lower with medication in the 0% BGase treatments. Peak molecular weight (Mp) and Mw  
37 were lower with BGase regardless of medication. The maximum molecular weight for the  
38 smallest 10%  $\beta$ -glucan (MW-10%) was lower with BGase. In Experiment 2, Mp was lower with  
39 medication in 0% BGase treatments. Beta-glucanase resulted in lower Mp regardless of  
40 medication, and the degree of response was lower with medication. The MW-10% was lower  
41 with BGase despite antibiotic addition. Body weight gain (BWG) and feed efficiency were  
42 higher with medication regardless of BGase use through-out the trial (except d 11-22 feed  
43 efficiency). Beta-glucanase resulted in higher BWG after d 11, and lower and higher feed  
44 efficiency before and after d 11, respectively, in unmedicated treatments. In conclusion, BGase  
45 and medication caused the depolymerization of soluble ileal  $\beta$ -glucan. Beta-glucanase appeared  
46 as a partial replacement for diet medication to increase coccidiosis challenged broiler  
47 performance.

48

49 Keywords: antibiotic, ionophore, prebiotic, oligosaccharide, fermentation

50

## 51 **Introduction**

52       Antibiotics have been used in poultry feed at sub-therapeutic doses for decades to  
53 improve growth and feed efficiency, and to prevent enteric infections [1]. However, the  
54 prolonged and indiscriminate use of antimicrobials in animal production is likely to cause the  
55 development of antibiotic resistance in pathogenic bacteria, and its' effect on animal and human  
56 health risk has led to reduced use of in-feed antibiotics in the poultry industry [2,3]. Therefore,  
57 the investigation of alternatives to antibiotics is a primary focus to control infectious enteric  
58 diseases and promote growth and gut health in poultry [4,5]. Potential alternatives to antibiotics  
59 that have been studied include probiotics, prebiotics, organic acids, essential oils and feed  
60 enzymes [6,7].

61       Prebiotics are non-digestible feed ingredients that beneficially affect the host by  
62 selectively stimulating the growth and function of beneficial microbiota in the digestive tract [8].  
63 The most commonly available prebiotics are oligosaccharides from various sources, and small  
64 molecular weight polysaccharides derived from cereal grains. Studies in the literature have  
65 focused on molecules such as fructo-oligosaccharides, mannose-oligosaccharides, xylo-  
66 oligosaccharides and arabinoxyloligosaccharides in terms of improving poultry digestive tract  
67 health and production performance, and modulating intestinal microbiota, epithelial integrity,  
68 and immune function in poultry. Dietary mannan-oligosaccharides have been shown to increase  
69 morphological development of the digestive tract and colonization of beneficial bacteria while

70 reducing pathogenic bacteria in chickens [9,10]. Fructo-oligosaccharides have also demonstrated  
71 beneficial effects on broiler chickens in terms of intestinal epithelial morphology [11,12],  
72 digestive tract microbiota [13,14], and bird immune response [15,16]. Dietary inclusion of  
73 arabinoxylo-oligosaccharides/ xylo-oligosaccharides affects gastro-intestinal microbial  
74 populations of chickens by increasing beneficial bacteria, including Bifidobacteria, Lactobacilli  
75 and *Clostridium* cluster XIV [17,18], and reducing *Salmonella* colonization in the caeca and  
76 translocation to the spleen [19]. In addition, exogenous xylanase in wheat-based diets increased  
77 the number of gastro-intestinal beneficial bacteria, including lactic acid bacteria, while reducing  
78 pathogenic bacteria in broiler chickens [20,21], probably by decreasing the molecular weight of  
79 soluble arabinoxylan derived from the wheat. Arabinoxylan has been extensively studied  
80 concerning its ability to act as a prebiotic since arabinoxylan is found in the cell walls of the  
81 most common cereals used in poultry feed (wheat and corn) and prebiotic oligosaccharides are  
82 presumed to be formed on use of a xylanase. However, research is limited regarding cereal  $\beta$ -  
83 glucan since it predominates in barley and oats, which are less commonly found in poultry feed.  
84 Therefore, it is relevant to investigate the effects of low molecular weight barley  $\beta$ -glucan  
85 produced by supplementing exogenous  $\beta$ -glucanase (BGase) in broilers fed barley-based diets.

86 Hulless barley (HB) contains a higher level of  $\beta$ -glucan compared to conventional barley  
87 due to the removal of the hull during processing [22,23]. Further, many HB cultivars are  
88 developed for the human food industry, and as a result, are selected for high  $\beta$ -glucan content  
89 [24]. Dietary enzymes such as endo- $\beta$ -glucanase depolymerize larger molecular weight  $\beta$ -glucan  
90 producing lower molecular weight compounds, which are fermentable in the distal digestive tract  
91 [25]. A consequence of fermentation is the production of short-chain fatty acids (SCFA), which  
92 are thought to improve digestive tract morphology and physiology and stimulate the

93 establishment of beneficial bacterial populations, while at the same time reducing colonization  
94 by pathogens [26,27]. However, the effects of exogenous BGase on microbial fermentation and  
95 digestive tract physiology and morphology are less-well studied, and the results have been  
96 inconsistent in previous research. Therefore, investigating the mechanism of action of diet BGase  
97 on HB  $\beta$ -glucan might contribute to the understanding of the enzyme effect on the digestive tract  
98 characteristics of chickens.

99         The mechanisms of action of feed medication are not fully understood, although  
100 antibiotics have been successfully used to promote growth and feed efficiency and improve bird  
101 health [16,28]. The primary mechanism is generally accepted to be a positive modulation of the  
102 diversity and relative abundance of bacteria in the digestive tract microbial community, and  
103 thereby the control of enteric disease and stimulation of immune function in broiler chickens [29  
104 -31]. However, other beneficial mechanisms are also possible. Investigating the interaction  
105 between medication and enzyme use in high fibre diets offers the potential to add knowledge on  
106 medication mechanisms of action and to study the effectiveness of enzymes in reducing the  
107 adverse effects of enteric disease. The effects of exogenous BGase and diet medication on broiler  
108 performance and digestive tract characteristics could depend on the age of the birds due to the  
109 distinct maturity of the digestive tract, including the development of gut microbiota, and housing  
110 conditions that affect the level of exposure to pathogenic organisms. Therefore, the current study  
111 utilized the same experimental design and treatments in two different environments. Experiment  
112 1 was completed in battery cages and a low disease challenge environment, while Experiment 2  
113 was completed in litter floor pens using broilers challenged with a vaccine against coccidiosis at  
114 5 d of age. The rationale for these experiments was to determine if treatments produce the same  
115 effects in the prescribed settings.

116           The objective of the current study was to investigate the effects of exogenous BGase and  
117 medication on ileal digesta soluble  $\beta$ -glucan molecular weight distribution, digestive tract  
118 characteristics, and production performance of broiler chickens fed an HB-based diet under  
119 different housing environments and disease conditions. It was hypothesized that exogenous  
120 BGase would depolymerize high molecular weight  $\beta$ -glucan, resulting in increased fermentation  
121 in the distal digestive tract and beneficial effects on the digestive tract morphology and  
122 physiology. This should result in improved production performance of broiler chickens and  
123 thereby reduce the requirement for medication in broilers fed HB-diets. Further, a higher  
124 response to exogenous BGase and a greater reduction of the necessity of diet medication would  
125 be expected from the broiler chickens from Experiment 2 (coccidiosis-challenged) compared to  
126 Experiment 1 due to increased environmental pressures.

127

## 128 **Materials and methods**

129           The experimental procedure was approved by the Animal Research Ethics Board of the  
130 University of Saskatchewan and conducted according to the Canadian Council on Animal Care  
131 guidelines for humane animal use [32,33].

### 132 **Birds and housing**

#### 133 **Experiment 1**

134           A total of 160 broiler chickens (Ross  $\times$  Ross 308) obtained from a commercial hatchery  
135 were housed in battery cages. The dimensions of the cages were 51 cm in length, 51 cm in width  
136 and 46 cm in height. The grid size of the wire mesh floor of each cage was  $2.54 \times 2.54$  but was  
137 covered by a  $1.27 \times 1.27$  cm mesh until d 7. There were two levels of battery cages that were in

138 two rows with back to back cages. The starting room temperature was 32°C, and it was gradually  
139 decreased by 2.8°C per week. The minimum light intensity was 25 lux during the experimental  
140 period, and the day length was 23 h (d 0-7) and 18 h (d 8-28). Birds were given feed and water  
141 *ad-libitum* throughout the experiment. Each cage had a front-mounted feed trough (51 cm in  
142 length) and two height-adjustable nipple drinkers. Extra feed and water were supplied to the  
143 birds from d 0 to 5 using supplementary chick feeders (50 cm long, plastic) and ice cube trays  
144 (16 cells), respectively. There were 10 cage replications per treatment and four birds per cage.  
145 Treatments were randomly assigned to the battery cages.

## 146 **Experiment 2**

147 A total of 2376 one d old male and female (Ross × Ross 308) broiler chickens were  
148 obtained from a commercial hatchery and randomly placed in 36 floor pens (2.3 m × 2.0 m) in  
149 nine environmentally controlled rooms. Each room contained four pens randomly assigned to the  
150 four treatments; each treatment was replicated nine times. Each pen (66 birds per pen) contained  
151 a tube feeder (pan diameter - 36 cm from 0 to 25 d and 43 cm after that) and a height-adjustable  
152 nipple drinker (six Lubing nipples). Additional feed and water were supplied to each pen using a  
153 cardboard egg tray and an ice cube tray, respectively, for the first week. Straw was placed in  
154 each room at a thickness of 7.5-10 cm. The room temperature was 33°C at the beginning of the  
155 experiment and was gradually reduced to 21°C by d 25. Day length was gradually reduced from  
156 23 h at d 0 to 17 h at d 12, and the light intensity was set to 20 lux at the start of the experiment  
157 and gradually decreased to 10 lux by d 10. Birds were given feed and water *ad-libitum*  
158 throughout the experiment.

## 159 **Experimental diets**

160           The dietary treatments were arranged according to a  $2 \times 2$  factorial arrangement (BGase  
161 and medication) in both experiments. Beta-glucanase (Econase GT 200 P from ABVista,  
162 Wiltshire, UK) levels were 0 and 0.1% (the  $\beta$ -glucanase activity of 0 and 200,000 BU/kg,  
163 respectively), and diets were fed without or with medication (Bacitracin (Zoetis Canada Inc.,  
164 Kirkland, QC, Canada) at 4.4 mg/kg and Salinomycin Sodium (Phibro Animal Health  
165 Corporation, Teaneck, NJ) at 25 mg/kg). Diets were based on 60% hullless barley (CDC Fibar)  
166 and were formulated to meet or exceed Ross 308 broiler nutrition specifications [34]. The  
167 ingredients and calculated nutrient levels are shown in Table 1. Diets were fed in crumble form  
168 in Experiment 1. In Experiment 2, starter diets (d 0-11) were fed in crumble form, and grower  
169 diets (d 11-33) were given initially in crumble form, and then switched to a pellet form. The  
170 pelleting temperature was controlled between 70-75°C to prevent high temperature-induced  
171 BGase inactivation during feed processing. Measured  $\beta$ -glucanase activity in diets approached  
172 the estimated values in both experiments, thereby confirming  $\beta$ -glucanase was added correctly,  
173 and that activity was not lost during feed processing. Xylanase activity was non-detectable in  
174 experimental diets.

175

176



**Table 1. Ingredients and calculated nutrient levels (%) of Experimental diets**

| Ingredient                                  | Experiment 1 | Experiment 2 |        |
|---------------------------------------------|--------------|--------------|--------|
|                                             |              | Starter      | Grower |
| Hulless barley                              | 60.00        | 59.09        | 60.00  |
| Wheat                                       | 4.46         | 0.00         | 4.55   |
| Soybean meal                                | 26.93        | 32.97        | 26.99  |
| Canola oil                                  | 4.07         | 3.29         | 4.13   |
| Monocalcium phosphate                       | 1.20         | 1.40         | 1.20   |
| Limestone                                   | 1.52         | 1.64         | 1.52   |
| Sodium chloride                             | 0.38         | 0.43         | 0.38   |
| Vitamin-mineral broiler premix <sup>1</sup> | 0.50         | 0.50         | 0.50   |
| Choline chloride                            | 0.10         | 0.10         | 0.10   |
| DL-Methionine                               | 0.27         | 0.30         | 0.27   |
| L-Threonine                                 | 0.05         | 0.07         | 0.05   |
| L-Lysine HCl                                | 0.22         | 0.21         | 0.22   |
| <b>Nutrient, calculated</b>                 |              |              |        |
| AME (kcal/kg)                               | 3100         | 3000         | 3100   |
| Crude protein                               | 21.24        | 23.46        | 21.24  |
| Crude fat                                   | 5.57         | 4.74         | 5.57   |
| Calcium                                     | 0.87         | 0.96         | 0.87   |
| Chloride                                    | 0.36         | 0.38         | 0.36   |
| Non-phytate phosphorous                     | 0.44         | 0.48         | 0.44   |
| Potassium                                   | 0.83         | 0.92         | 0.83   |
| Sodium                                      | 0.18         | 0.20         | 0.18   |
| Digestible arginine                         | 1.35         | 1.50         | 1.35   |
| Digestible isoleucine                       | 0.81         | 0.90         | 0.81   |
| Digestible leucine                          | 1.47         | 1.61         | 1.47   |
| Digestible lysine                           | 1.15         | 1.28         | 1.15   |
| Digestible methionine                       | 0.54         | 0.60         | 0.54   |
| Digestible methionine and cysteine          | 0.87         | 0.95         | 0.87   |
| Digestible threonine                        | 0.77         | 0.86         | 0.77   |
| Digestible tryptophan                       | 0.24         | 0.27         | 0.24   |
| Digestible valine                           | 0.87         | 0.96         | 0.87   |

<sup>1</sup>Vitamin-mineral premix provided the following per kilogram of complete diet: vitamin A, 11,000 IU; vitamin D<sub>3</sub>, 2,200 IU; vitamin E, 30 IU; menadione, 2 mg; thiamine, 1.5 mg; riboflavin, 6 mg; pyridoxine, 4 mg; vitamin B<sub>12</sub>, 0.02 mg; niacin, 60 mg; pantothenic acid, 10 mg; folic acid, 0.6 mg; biotin 0.15 mg; copper, 10 mg; iron, 80 mg; manganese 80 mg; iodine, 0.8 mg; zinc, 80 mg; selenium, 0.3 mg; calcium carbonate 500 mg; ethoxyquin 0.63 mg; wheat middlings 3773 mg.

## 179 **Coccidiosis challenge**

180           In Experiment 2, all the birds were challenged with the Coccivac B-52 live vaccine  
181 (Merck Animal Health; 1.3× recommended dose). The vaccination was completed at d 5 to  
182 facilitate uniform intake of coccidian oocysts by the birds. The vaccine contains oocysts of  
183 *Eimeria acervulina*, *E. mivatis*, *E. maxima* and *E. tenella*. The vaccine was sprayed on feed  
184 located in a cardboard egg tray and into water placed in an ice cube tray. A 30 cm wide Kraft  
185 brown paper strip (Model S-8511S, ULINE Canada, Milton, Ontario, Canada) was placed under  
186 the full length of the nipple drinker line in each pen before vaccination to facilitate oocyst  
187 ingestion by the birds. In addition, 60% relative humidity was maintained in the rooms, using  
188 humidifiers and water application, to facilitate oocyst cycling. Feeders and drinkers were raised  
189 in each pen before vaccination and were put-down once the vaccine containing feed and water  
190 was consumed by the birds.

## 191 **Performance data collection**

192           Body weight and feed intake (FI) were measured on a cage basis at d 7, 14, 21 and 28 in  
193 Experiment 1. In Experiment 2, body weight and FI were measured on a pen basis at d 11, 22  
194 and 32. Mortality was recorded daily, and dead birds were sent to Prairie Diagnostic Services for  
195 necropsy.

## 196 **Sample collection**

197           In Experiment 1, all birds were euthanized on d 28, whereas in Experiment 2, a total of  
198 four birds per pen were euthanized at two collection points (d 11 and 33). Birds were euthanized  
199 by administering T-61 (Embutramide, Mebezonium iodide and tetracaine; Merck animal health,

200 Kirkland, Quebec, Canada) into the brachial vein. Birds were weighed individually. Two birds  
201 were used for pH measurement and to collect samples for SCFA analysis and histology (in  
202 Experiment 2 only) at each collection. *In-situ* pH of the crop, gizzard, duodenum, jejunum,  
203 ileum, caeca and colon contents was measured using a Beckman Coulter 34 pH meter (Model  
204 PHI 34, Beckman Instruments, Fullerton, CA). Two 1 cm samples of mid-ileum were sectioned,  
205 placed in 10% neutral buffered formalin, and stored at room temperature until histo-morphology  
206 evaluation. Total ileal and caecal contents were collected into plastic centrifuge tubes and stored  
207 at -20°C for the analysis of SCFA. Two birds were used to collect digestive tract size, content,  
208 and organ data at each collection in both trials. The digestive tract was detached from the bird  
209 carcass and then sectioned into the crop, proventriculus, gizzard, duodenum, jejunum, ileum,  
210 caeca and colon; the liver, spleen and pancreas were removed and weighed. Full and empty  
211 weights of all sections and the length of each intestinal section were recorded. The content  
212 weight of each section was determined by subtracting empty weight from the full weight.  
213 Relative tissue weights and lengths were calculated based on individual bird weight. Total ileal  
214 contents were collected into plastic snap-cap vials (pooled from all the birds in a cage in  
215 Experiment 1; one bird per pen in Experiment 2) and centrifuged for 5 min at  $17013 \times g$  using a  
216 Beckman microfuge (Model E 348720, Beckman Instruments, INC, Palo Alto, CA). Then the  
217 viscosity of ileal supernatant was measured using a Brookfield cone-plate digital viscometer  
218 (Model LVDV-III, Brookfield Engineering Labs, INC, Stoughton, MA 02072), which was  
219 maintained at 40°C (40 rpm; shear rate  $300 \text{ s}^{-1}$ ). The rest of the ileal supernatant was stored at -  
220 80°C for  $\beta$ -glucan molecular weight distribution analysis.

## 221 **Nutritional analysis**

222 The ingredients (HB and wheat) were ground using a Retsch laboratory mill (Retsch ZM  
223 200, Germany) and analyzed for total starch, CP, fat, ash, moisture and fibre following AOAC,  
224 AACC and ICC standard methods [35-37]. Ingredients were analyzed for total starch using the  
225 AOAC method 996.11 and the AACC method 76-13.01 using a Megazyme kit (Total starch  
226 assay procedure, Amyloglucosidase/ $\alpha$ -amylase method, Megazyme International Ireland Ltd.,  
227 Bray Business Park, Bray, Co. Wicklow, Ireland). Nitrogen was analyzed using a Leco nitrogen  
228 analyzer (Model Leco-FP-528L, Leco Corporation, St. Joseph, MA, USA), and 6.25 was the N  
229 to CP conversion factor. Ether extraction was completed using Goldfish Extraction Apparatus  
230 (Labconco model 35001; Labconco, Kansas, MO, USA) following the AOAC method 920.39 to  
231 determine fat content. Ash content was analyzed according to the AOAC method 942.05 using a  
232 muffle oven (Model Lindberg/Blue BF51842C, Asheville, NC 28804, USA). Moisture was  
233 analyzed using the AOAC method 930.15. The analysis of insoluble dietary fibre (IDF) and  
234 soluble dietary fibre (SDF) was completed using a Megazyme kit (Total dietary fibre assay  
235 procedure, Megazyme International Ireland Ltd., Bray Business Park, Bray, Co. Wicklow,  
236 Ireland) according to the AOAC method 991.43 and the AACC method 32-07.01. Total dietary  
237 fibre (TDF) was obtained by adding IDF and SDF. Beta-glucan was analyzed using a Megazyme  
238 analysis kit (Mixed-linkage beta-glucan assay procedure/McCleary method, Megazyme  
239 International Ireland Ltd., Bray Business Park, Bray, Co. Wicklow, Ireland) according to the  
240 AOAC Method 995.16, AACC Method 32-23, and ICC Standard Method No. 168. In addition,  
241 diets were analyzed for  $\beta$ -glucanase (EC 3.2.1.6) and xylanase activity (EC 3.2.1.8) according to  
242 the AB Vista methods of ESC Standard Analytical Methods SAM042-01 and SAM038,  
243 respectively (ABVista, Wiltshire, UK).

## 244 **Beta-glucan molecular weight distribution**

245 Ileal supernatant samples were boiled for 15 min and centrifuged at  $17,013 \times g$  for 10  
246 min using a Beckman microfuge (Model E348720, Beckmann instruments, INC, Palo Alto, CA).  
247 The sample was then analyzed for  $\beta$ -glucan molecular weight using size exclusion  
248 chromatography and calcofluor post-column derivatization [38]. The two columns used for  
249 HPLC were Shodex OHpak SB-806M with OHpak SB-G column guard and a Waters  
250 Ultrahydrogel linear column. The mobile phase was 0.1M Tris buffer (pH=8). Molar mass  
251 distribution curves were used to obtain  $\beta$ -glucan Mp, weight average molecular weight (Mw),  
252 and the maximum molecular weight for the smallest 10%  $\beta$ -glucan molecules (MW-10%) of  
253 each sample. Peak molecular weight is the molecular weight of the highest  $\beta$ -glucan fraction.  
254 Weight average molecular weight is the average of the molecular weights of all  $\beta$ -glucan  
255 molecules (considering the weight fraction of each type of molecule).

## 256 **Short chain fatty acids analysis**

257 Short chain fatty acids were analyzed in triplicate according to the procedure described  
258 by [39] with minor changes. The internal standard for the analysis was made up of 20 ml of 25%  
259 phosphoric acid, 300  $\mu$ l of isocaproic acid, and deionized water. Three hundred microliters of  
260 acetic acid, 200  $\mu$ l of propionic acid, 100  $\mu$ l of butyric acid, and 50  $\mu$ l of isobutyric, isovaleric,  
261 valeric, caproic and lactic acids were used to make the standard solution. The digesta was thawed  
262 and mixed with 25% phosphoric acid at 1:1 and kept at room temperature for 10 min with  
263 occasional shaking. It was then centrifuged at  $12,500 \times g$  for 10 min. The supernatant (1 ml) was  
264 mixed with 1 ml of the internal standard and centrifuged at  $12,500 \times g$  for 10 min. It was filtered  
265 using a 0.45-micron nylon filter, and the filtrate was placed in a GC autosampler vial and

266 injected into a Zebron Capillary Gas Chromatography column (length 30m, internal diameter  
267 0.25 mm, film thickness 0.25  $\mu\text{m}$ ; (Zebron<sup>TM</sup>ZB-FFAP, Phenomenex, Torrance, CA). The SCFA  
268 analysis was completed using the Thermo Scientific Gas Chromatography system (Model Trace  
269 1310, Milan, Italy).

## 270 **Histomorphology of gastro-intestinal wall**

271 In Experiment 2, ileal tissue samples were cut into two longitudinal sections and  
272 embedded in paraffin. Two slides were made from each sample to obtain ileal morphology  
273 measurements (Hematoxylin and Eosin stain) and goblet cell (GC) categorization (Alcian Blue/  
274 Periodic Acid-Schiff stain). An Optika B-290TB digital microscope (Bergamo, Italy) was used to  
275 observe slides, and an HDCE-X3 digital camera with Optika Vision Lite software was used to  
276 capture the images. Well-oriented 8-10 villi and crypts per section were used to measure villi  
277 length, width, and crypt depth. Villi length was considered as the length from the tip of a villus  
278 to the villus-crypt junction. The villi width was measured at the middle of the villus height. The  
279 depth of the invagination between adjacent villi was considered as the crypt depth. Goblet cells  
280 were counted around the perimeter of 8-10 well-oriented villi per section, and the three  
281 categories of GC were identified, acidic mucin-producing GC (stained in blue), neutral mucin-  
282 producing GC (stained in magenta) and mixed mucin-producing GC (stained in purple) [40].

## 283 **Statistical analysis**

284 Data were analyzed using the Proc Mixed model of SAS 9.4 [41]. Both experiments were  
285 randomized complete block designs, and the battery cage level and room were considered as  
286 blocks for Experiments 1 and 2, respectively. Treatments were replicated 10 times in Experiment  
287 1 (battery cages equally distributed in two levels), and nine times in Experiment 2 (one pen in

288 nine different rooms). Differences were considered significant when  $P \leq 0.05$ . Data were  
289 checked for normality and analyzed using 2-way ANOVA. Tukey-Kramer test was used to detect  
290 significant differences between means.

291

## 292 **Results**

### 293 **Ingredient nutrient composition**

294 In Experiment 1, TDF, IDF, SDF and total  $\beta$ -glucan in HB were 29.0, 19.6, 9.6 and  
295 8.70%, respectively, and the same parameters were 15.2, 13.7, 1.6 and 0.68%, respectively for  
296 wheat. The content of total starch, CP, fat and ash were measured as 49.7, 16.2, 2.4 and 2.4%,  
297 respectively, in HB, and as 64.1, 15.0, 1.2 and 1.9% in wheat. In Experiment 2, TDF, IDF, SDF  
298 and total  $\beta$ -glucan were 26.7, 18.9, 7.8 and 8.70% (HB); 14.4, 12.4, 2.0 and 0.64% (wheat),  
299 respectively. In addition, total starch, CP, fat and ash were determined to be 53.7, 16.2, 2.8 and  
300 2.4% in HB, and as 62.8, 14.9, 1.2 and 1.7% in wheat, respectively.

### 301 **Beta-glucan molecular weight distribution**

302 In Experiment 1, both Mp and Mw were affected by the interaction between main effects;  
303 values were lower with enzyme use regardless of diet medication, but the degree of response was  
304 less in medicated diets. In addition, Mw was lower with the use of medication when the birds  
305 were given diets without BGase. The MW-10% values were unaffected by medication but were  
306 lower with 0.1% compared to 0% BGase.

307 In Experiment 2, interactions were found for all molecular weight criteria at both ages  
308 (11 and 33 d) except for Mw at 11 d, which was also unaffected by medication or BGase. Values  
309 for Mp and Mw-10% followed a similar trend, with enzyme consistently reducing values, but

310 with the degree of response less in medicated diets. In the absence of the enzyme, medication  
311 reduced Mp at both ages and MW-10% on d 33. The interaction for Mw at 33 d was due to  
312 enzyme decreasing and increasing Mw for nonmedicated and medicated diets, respectively.

313         Figures 1A and 1B compare the  $\beta$ -glucan molecular weight distribution of ileal digesta  
314 from 11 d broilers fed diets without medication, and without and with BGase, respectively, in  
315 Experiment 2. Beta-glucanase increased the proportion of low molecular weight  $\beta$ -glucan, as  
316 shown by curve placement relative to the blue line at x-axis point  $1e^4$ . Diet medication also  
317 increased the proportion of low molecular weight  $\beta$ -glucan in comparison to the nonmedicated  
318 diet, and this is contrasted in Figs 1A and 1C.

319 **Figure 1.** Beta-glucan molecular weight distribution in soluble ileal digesta from 11 d broilers  
320 fed 60% hullless barley diets in Experiment 2. Blue lines denote point  $1e^4$  on the x-axis and red  
321 lines indicate the Mp of the distribution curve. (A) Without medication, 0%  $\beta$ -glucanase (B)  
322 Without medication, 0.1%  $\beta$ -glucanase (C) With medication, 0%  $\beta$ -glucanase

323



**Table 2. Effects of diet medication and  $\beta$ -glucanase on  $\beta$ -glucan molecular weight in ileal content of broiler chickens**

| Medication                              | $\beta$ -glucanase (%) | Molecular weight (g/mol) |                    |                   |                    |        |                    |                    |                    |                    |
|-----------------------------------------|------------------------|--------------------------|--------------------|-------------------|--------------------|--------|--------------------|--------------------|--------------------|--------------------|
|                                         |                        | Experiment 1             |                    |                   | Experiment 2       |        |                    |                    |                    |                    |
|                                         |                        | d 28                     |                    |                   | d 11               |        |                    | d 33               |                    |                    |
|                                         |                        | Mp <sup>1</sup>          | Mw                 | MW-10%            | Mp                 | Mw     | MW-10%             | Mp                 | Mw                 | MW-10%             |
| without                                 | 0                      | 19799 <sup>a</sup>       | 36199 <sup>a</sup> | 6096              | 78293 <sup>a</sup> | 80971  | 33322 <sup>a</sup> | 65176 <sup>a</sup> | 69508 <sup>a</sup> | 29025 <sup>a</sup> |
|                                         | 0.1                    | 7793 <sup>b</sup>        | 8434 <sup>c</sup>  | 1955              | 24568 <sup>c</sup> | 63835  | 7250 <sup>b</sup>  | 16985 <sup>c</sup> | 48316 <sup>b</sup> | 7074 <sup>c</sup>  |
| with                                    | 0                      | 16824 <sup>a</sup>       | 19119 <sup>b</sup> | 5326              | 54475 <sup>b</sup> | 59002  | 26065 <sup>a</sup> | 40595 <sup>b</sup> | 49017 <sup>b</sup> | 13586 <sup>b</sup> |
|                                         | 0.1                    | 10401 <sup>b</sup>       | 9929 <sup>c</sup>  | 2201              | 27677 <sup>c</sup> | 61898  | 10586 <sup>b</sup> | 22144 <sup>c</sup> | 60641 <sup>a</sup> | 8157 <sup>c</sup>  |
| SEM <sup>2</sup>                        |                        | 1148.1                   | 2513.9             | 509.2             | 5982.7             | 3537.4 | 2717.0             | 4481.7             | 2258.9             | 1890.1             |
| Main effects                            |                        |                          |                    |                   |                    |        |                    |                    |                    |                    |
| <i>Medication</i>                       |                        |                          |                    |                   |                    |        |                    |                    |                    |                    |
| without                                 |                        | 13796                    | 22317              | 4025              | 51431              | 72403  | 20286              | 41080              | 58912              | 18049              |
| with                                    |                        | 13612                    | 14524              | 3763              | 41076              | 60450  | 18325              | 31370              | 54829              | 10871              |
| <i><math>\beta</math>-glucanase (%)</i> |                        |                          |                    |                   |                    |        |                    |                    |                    |                    |
| 0                                       |                        | 18311                    | 27659              | 5711 <sup>a</sup> | 66384              | 69986  | 29694              | 52885              | 59263              | 21305              |
| 0.1                                     |                        | 9096                     | 9181               | 2078 <sup>b</sup> | 26122              | 62867  | 8918               | 19565              | 54479              | 7615               |
| <i>Probability</i>                      |                        |                          |                    |                   |                    |        |                    |                    |                    |                    |
| Medication                              |                        | 0.86                     | 0.001              | 0.70              | 0.08               | 0.06   | 0.39               | 0.04               | 0.16               | <.0001             |
| $\beta$ -glucanase                      |                        | <.0001                   | <.0001             | <.0001            | <.0001             | 0.21   | <.0001             | <.0001             | 0.10               | <.0001             |
| Medication $\times$ $\beta$ -glucanase  |                        | 0.01                     | 0.0004             | 0.45              | 0.03               | 0.09   | 0.03               | 0.004              | <.0001             | <.0001             |

<sup>a-c</sup>Means within a main effect or interaction not sharing a common superscript are significantly different ( $P \leq 0.05$ ).

<sup>1</sup>Mp - peak molecular weight; Mw - weight average molecular weight; MW-10% - The maximum molecular weight for the smallest 10% molecules.

<sup>2</sup>SEM - pooled standard error of mean (d 28, n=6 cages per treatment; d 11 and 33, n=6 birds per treatment).



## 336 **Short chain fatty acids and gastro-intestinal pH**

337 Ileal digesta SCFA levels and molar percentages were not affected by dietary treatments  
338 in Experiment 1, except for caproic acid concentration, where values were lower with BGase  
339 supplementation (Table 4). Similarly, caecal digesta SCFA concentrations and molar percentages  
340 were also not affected by treatment (Table 5). Noteworthy, the interaction between medication  
341 and BGase tended to be significant ( $P = 0.06-0.09$ ) for the concentrations of total and individual  
342 SCFA. In all cases, levels tended to decrease with enzyme use in the non-medicated diets and  
343 increase with enzyme use in the medicated diets.

344 To a large extent, dietary treatment did not affect ileal digesta SCFA of 11d old broilers  
345 in Experiment 2 (Table 6). The exception was a significant interaction between medication and  
346 BGase for valeric acid. Without medication, levels of valeric acid decreased with enzyme use,  
347 while levels increased with enzyme use when the medication was included in the diet. A similar  
348 trend ( $P = 0.10$ ) was noted for isovaleric acid. Levels of caproic acid decreased with enzyme use.  
349 Interactions between the main effects were found for the molar percentages of valeric, isovaleric  
350 ( $P = 0.06$ ), and caproic acids. In diets without medication, BGase did not affect acid  
351 concentration. When the medication was used, BGase increased acid levels. Dietary treatment  
352 interactions were also noted for the proportional levels of propionic and lactic acids. All mean  
353 differences were small and often not significant, but values tended to increase and decrease with  
354 BGase use in nonmedicated and medicated diets, respectively.

355 The interactions between medication and BGase use at 11 d were significant for total and  
356 individual caecal digesta SCFA (Table 7). The concentrations were higher with 0.1 compared to  
357 0% BGase in the birds given diets without medication. However, BGase did not affect SCFA  
358 concentrations in the treatments with medication. Concentrations for birds fed medicated diets

359 were lower than those fed un-medicated diets for the treatments with BGase. The molar  
360 percentages of propionic and isobutyric acids were decreased by medication, while enzyme use  
361 decreased and increased the proportions of acetic and butyric acids, and valeric acid,  
362 respectively. The interaction between main effects was significant for the proportional isovaleric  
363 levels, with enzyme tending to decrease levels in unmedicated diets and increase levels in  
364 medicated diets. Although the above effects were significant, differences were small.

365 Medication and the interactions between medication and BGase did not affect the  
366 concentrations and molar percentages of ileal SCFA at d 33 (Table 8). All ileal SCFA  
367 concentrations except butyric acid were higher because of BGase use. In addition, the  
368 percentages of valeric and isovaleric acids were higher for the 0.1 compared to the 0% BGase  
369 treatment. In contrast, the lactic acid percentage was slightly lower with enzyme use.

370 Main effect interactions were not found for the concentrations and molar percentages of  
371 caecal digesta SCFA at d 33 (Table 9). However, the concentrations of total SCFA and acetic  
372 acid were lower in medicated diets. Similarly, all other SCFA levels except butyric acid tended  
373 ( $P = 0.06-0.07$ ) to be lower with medication use. The molar percentages of acetic acid decreased,  
374 while butyric, valeric ( $P = 0.08$ ) and isovaleric ( $P = 0.09$ ) acids increased with medication use.  
375 Enzyme use decreased the molar percentage of acetic acid and increased values for all other  
376 SCFA except butyric acid but minimal changes again, as noted earlier.

377 Except for the duodenum, medication, BGase, and their interactions did not affect the  
378 digestive tract pH in Experiment 1 (Table 10). Enzyme use increased duodenal pH from 6.08 to  
379 6.20. Main effect interactions were not found for the digestive tract pH, except for caecal pH at d  
380 11 in Experiment 2 (Table 11); pH was lower with the enzyme use, but only in the diets without  
381 medication. Medication resulted in higher pH in the crop at d 11, and the ileum at both d 11 and

382 33. Duodenal and ileal pH was higher with the use of BGase at d 11. Gizzard and caecal pH were  
383 lower with the enzyme, and ileal pH was higher with the addition of diet BGase at d 33.

**Table 3. Effects of diet medication and  $\beta$ -glucanase on ileal digesta short chain fatty acids of broiler chickens at 28 days of age (Experiment 1)**

| Medication             | BGase <sup>1</sup><br>(%) | SCFA $\mu$ mol/g of wet ileal content |      |      |      |      |      |      |                  |      | Molar percentage of total SCFA |      |      |      |      |      |      |      |
|------------------------|---------------------------|---------------------------------------|------|------|------|------|------|------|------------------|------|--------------------------------|------|------|------|------|------|------|------|
|                        |                           | Total                                 | Ace  | Pro  | But  | Isob | Val  | Isov | Cap              | Lac  | Ace                            | Pro  | But  | Isob | Isov | Val  | Cap  | Lac  |
| without                | 0                         | 165.8                                 | 61.8 | 22.2 | 10.6 | 2.7  | 3.3  | 2.9  | 1.3              | 60.6 | 37.5                           | 13.1 | 6.4  | 1.6  | 1.7  | 1.9  | 0.7  | 36.6 |
|                        | 0.1                       | 157.2                                 | 59.1 | 20.8 | 10.3 | 2.9  | 2.6  | 2.2  | 1.0              | 58.0 | 37.6                           | 13.3 | 6.5  | 1.8  | 1.4  | 1.6  | 0.6  | 36.9 |
| with                   | 0                         | 173.5                                 | 66.4 | 23.4 | 10.8 | 2.5  | 2.7  | 2.9  | 1.5              | 63.0 | 38.3                           | 13.2 | 6.3  | 1.4  | 1.6  | 1.5  | 0.8  | 36.5 |
|                        | 0.1                       | 156.9                                 | 59.1 | 21.8 | 10.3 | 2.4  | 2.6  | 2.6  | 1.2              | 56.5 | 37.6                           | 14.0 | 6.6  | 1.4  | 1.6  | 1.6  | 0.8  | 36.1 |
| SEM <sup>2</sup>       |                           | 4.51                                  | 1.66 | 0.75 | 0.31 | 0.18 | 0.17 | 0.17 | 0.07             | 1.60 | 0.23                           | 0.28 | 0.09 | 0.10 | 0.09 | 0.08 | 0.09 | 0.24 |
| Main effects           |                           |                                       |      |      |      |      |      |      |                  |      |                                |      |      |      |      |      |      |      |
| <i>Medication</i>      |                           |                                       |      |      |      |      |      |      |                  |      |                                |      |      |      |      |      |      |      |
|                        |                           | 161.5                                 | 60.5 | 21.5 | 10.4 | 2.8  | 2.9  | 2.6  | 1.1              | 59.3 | 37.6                           | 13.2 | 6.5  | 1.7  | 1.5  | 1.7  | 0.7  | 36.7 |
|                        |                           | 165.2                                 | 62.7 | 22.6 | 10.5 | 2.4  | 2.6  | 2.8  | 1.3              | 59.8 | 38.0                           | 13.6 | 6.4  | 1.4  | 1.6  | 1.5  | 0.8  | 36.3 |
| <i>BGase (%)</i>       |                           |                                       |      |      |      |      |      |      |                  |      |                                |      |      |      |      |      |      |      |
|                        | 0                         | 169.6                                 | 64.1 | 22.8 | 10.7 | 2.6  | 3.0  | 2.9  | 1.4 <sup>a</sup> | 61.8 | 37.9                           | 13.2 | 6.3  | 1.5  | 1.7  | 1.7  | 0.8  | 36.6 |
|                        | 0.1                       | 157.0                                 | 59.1 | 21.3 | 10.3 | 2.6  | 2.6  | 2.4  | 1.1 <sup>b</sup> | 57.2 | 37.6                           | 13.6 | 6.6  | 1.6  | 1.5  | 1.6  | 0.7  | 36.5 |
| <i>Probability (%)</i> |                           |                                       |      |      |      |      |      |      |                  |      |                                |      |      |      |      |      |      |      |
|                        | Medication                | 0.66                                  | 0.46 | 0.41 | 0.86 | 0.31 | 0.38 | 0.55 | 0.10             | 0.87 | 0.38                           | 0.48 | 0.80 | 0.13 | 0.78 | 0.25 | 0.08 | 0.38 |
|                        | BGase                     | 0.13                                  | 0.11 | 0.28 | 0.53 | 0.94 | 0.28 | 0.11 | 0.02             | 0.13 | 0.57                           | 0.45 | 0.27 | 0.55 | 0.34 | 0.55 | 0.10 | 0.85 |
|                        | Medication $\times$ BGase | 0.63                                  | 0.45 | 0.94 | 0.90 | 0.67 | 0.36 | 0.52 | 0.73             | 0.51 | 0.40                           | 0.59 | 0.61 | 0.57 | 0.34 | 0.23 | 0.35 | 0.47 |

<sup>a-d</sup>Means within a main effect or interaction not sharing a common superscript are significantly different ( $P \leq 0.05$ ).

<sup>1</sup>BGase -  $\beta$ -glucanase; SCFA - short chain fatty acids; Ace - Acetic acid; Pro - Propionic acid; But - Butyric acid; Isob - Isobutyric acid; Val - Valeric acid; Isov - Isovaleric acid; Cap - Caproic acid.

<sup>2</sup>SEM - pooled standard error of mean (n=20 birds per treatment).

387 **Table 4. Effects of diet medication and  $\beta$ -glucanase on caecal short chain fatty acids of broiler chickens aged 28 days**  
 388 **(Experiment 1)**

| Medication                | BGase <sup>1</sup><br>(%) | SCFA $\mu$ mol/g of wet caecal content |       |      |      |      |      |      |      | Molar percentage of total SCFA |      |      |      |      |      |      |
|---------------------------|---------------------------|----------------------------------------|-------|------|------|------|------|------|------|--------------------------------|------|------|------|------|------|------|
|                           |                           | Total                                  | Ace   | Pro  | But  | Isob | Val  | Isov | Cap  | Ace                            | Pro  | But  | Isob | Val  | Isov | Cap  |
| without                   | 0                         | 284.2                                  | 166.6 | 58.5 | 28.0 | 9.9  | 8.6  | 8.6  | 3.7  | 58.7                           | 20.5 | 9.8  | 3.5  | 3.0  | 3.0  | 1.3  |
|                           | 0.1                       | 273.9                                  | 161.7 | 56.5 | 27.0 | 8.4  | 8.3  | 8.3  | 3.5  | 59.0                           | 20.6 | 9.9  | 3.0  | 3.0  | 3.0  | 1.3  |
| with                      | 0                         | 267.5                                  | 158.0 | 55.2 | 26.2 | 8.2  | 8.1  | 8.1  | 3.5  | 59.0                           | 20.6 | 9.8  | 3.0  | 3.0  | 3.0  | 1.3  |
|                           | 0.1                       | 310.3                                  | 183.1 | 64.0 | 30.6 | 9.5  | 9.3  | 9.4  | 4.0  | 58.9                           | 20.6 | 9.8  | 3.0  | 3.0  | 3.0  | 1.3  |
| SEM <sup>2</sup>          |                           | 7.59                                   | 4.49  | 1.60 | 0.74 | 0.35 | 0.23 | 0.23 | 0.10 | 0.23                           | 0.28 | 0.09 | 0.10 | 0.08 | 0.09 | 0.03 |
| Main effects              |                           |                                        |       |      |      |      |      |      |      |                                |      |      |      |      |      |      |
| <i>Medication</i>         |                           |                                        |       |      |      |      |      |      |      |                                |      |      |      |      |      |      |
| without                   |                           | 279.0                                  | 164.1 | 57.5 | 27.5 | 9.1  | 8.4  | 8.5  | 3.6  | 58.8                           | 20.5 | 9.8  | 3.3  | 3.0  | 3.0  | 1.3  |
| with                      |                           | 288.9                                  | 170.5 | 59.6 | 28.4 | 8.8  | 8.7  | 8.8  | 3.7  | 59.0                           | 20.6 | 9.8  | 3.0  | 3.0  | 3.0  | 1.3  |
| <i>BGase (%)</i>          |                           |                                        |       |      |      |      |      |      |      |                                |      |      |      |      |      |      |
| 0                         |                           | 275.8                                  | 162.3 | 56.8 | 27.1 | 9.0  | 8.3  | 8.4  | 3.6  | 58.8                           | 20.5 | 9.8  | 3.3  | 3.0  | 3.0  | 1.3  |
| 0.1                       |                           | 292.1                                  | 172.4 | 60.2 | 28.8 | 8.9  | 8.8  | 8.9  | 3.8  | 59.0                           | 20.6 | 9.9  | 3.0  | 3.0  | 3.0  | 1.3  |
| <i>Probability (%)</i>    |                           |                                        |       |      |      |      |      |      |      |                                |      |      |      |      |      |      |
| Medication                |                           | 0.50                                   | 0.46  | 0.50 | 0.53 | 0.69 | 0.51 | 0.49 | 0.48 | 0.57                           | 0.57 | 0.90 | 0.30 | 0.62 | 0.49 | 0.47 |
| BGase                     |                           | 0.27                                   | 0.25  | 0.27 | 0.23 | 0.85 | 0.31 | 0.30 | 0.30 | 0.57                           | 0.65 | 0.48 | 0.27 | 0.94 | 0.92 | 0.95 |
| Medication $\times$ BGase |                           | 0.07                                   | 0.09  | 0.08 | 0.06 | 0.06 | 0.08 | 0.08 | 0.08 | 0.47                           | 0.71 | 0.99 | 0.28 | 0.61 | 0.76 | 0.84 |

<sup>a-d</sup>Means within a main effect or interaction not sharing a common superscript are significantly different ( $P \leq 0.05$ ).

<sup>1</sup>BGase -  $\beta$ -glucanase; SCFA - short chain fatty acids; Ace - Acetic acid; Pro - Propionic acid; But - Butyric acid; Isob - Isobutyric acid; Val - Valeric acid; Isov - Isovaleric acid; Cap - Caproic acid.

<sup>2</sup>SEM - pooled standard error of mean (n=20 birds per treatment).

390 **Table 6. Effects of diet medication and  $\beta$ -glucanase on ileal short chain fatty acids of broiler chickens aged 11 days**  
 391 **(Experiment 2)**

| Medication             | BGase <sup>1</sup><br>(%) | SCFA $\mu$ mol/g of wet ileal content |      |      |      |                   |      |                   |      | Molar percentage of total SCFA |                    |      |                   |      |                  |                    |
|------------------------|---------------------------|---------------------------------------|------|------|------|-------------------|------|-------------------|------|--------------------------------|--------------------|------|-------------------|------|------------------|--------------------|
|                        |                           | Total                                 | Ace  | Pro  | But  | Val               | Isov | Cap               | Lac  | Ace                            | Pro                | But  | Val               | Isov | Cap              | Lac                |
| without                | 0                         | 125.3                                 | 48.2 | 18.4 | 8.2  | 2.7 <sup>a</sup>  | 1.5  | 1.19              | 44.9 | 38.4                           | 14.6 <sup>ab</sup> | 6.5  | 2.1 <sup>a</sup>  | 1.2  | 0.9 <sup>a</sup> | 35.8 <sup>ab</sup> |
|                        | 0.1                       | 122.5                                 | 47.6 | 18.3 | 8.1  | 1.5 <sup>bc</sup> | 1.4  | 0.79              | 44.6 | 38.8                           | 14.9 <sup>a</sup>  | 6.6  | 1.2 <sup>ab</sup> | 1.1  | 0.9 <sup>a</sup> | 36.4 <sup>ab</sup> |
| with                   | 0                         | 121.5                                 | 46.8 | 18.0 | 7.6  | 1.3 <sup>c</sup>  | 1.4  | 1.19              | 45.1 | 38.6                           | 14.8 <sup>ab</sup> | 6.2  | 1.1 <sup>b</sup>  | 1.1  | 0.6 <sup>b</sup> | 36.9 <sup>a</sup>  |
|                        | 0.1                       | 118.7                                 | 45.3 | 17.2 | 7.7  | 2.5 <sup>ab</sup> | 2.5  | 1.10              | 42.1 | 38.2                           | 14.5 <sup>b</sup>  | 6.5  | 2.1 <sup>a</sup>  | 2.1  | 0.9 <sup>a</sup> | 35.4 <sup>b</sup>  |
| SEM <sup>2</sup>       |                           | 1.93                                  | 0.71 | 0.28 | 0.22 | 0.17              | 0.19 | 0.05              | 0.84 | 0.21                           | 0.05               | 0.13 | 0.13              | 0.15 | 0.03             | 0.17               |
| Main effects           |                           |                                       |      |      |      |                   |      |                   |      |                                |                    |      |                   |      |                  |                    |
| <u>Medication</u>      |                           |                                       |      |      |      |                   |      |                   |      |                                |                    |      |                   |      |                  |                    |
|                        |                           | 123.9                                 | 47.9 | 18.3 | 8.2  | 2.1               | 1.4  | 0.99              | 44.8 | 38.6                           | 14.8               | 6.6  | 1.7               | 1.1  | 0.7              | 36.1               |
|                        |                           | 120.6                                 | 46.1 | 17.6 | 7.6  | 1.9               | 1.9  | 1.14              | 43.6 | 38.4                           | 14.6               | 6.4  | 1.6               | 1.6  | 0.9              | 36.2               |
| <u>BGase (%)</u>       |                           |                                       |      |      |      |                   |      |                   |      |                                |                    |      |                   |      |                  |                    |
|                        | 0                         | 123.4                                 | 47.5 | 18.2 | 7.9  | 2.0               | 1.4  | 1.19 <sup>a</sup> | 45.0 | 38.5                           | 14.7               | 6.4  | 1.6               | 1.1  | 0.9              | 36.4               |
|                        | 0.1                       | 120.6                                 | 46.4 | 17.7 | 7.9  | 2.0               | 1.9  | 0.95 <sup>b</sup> | 43.4 | 38.5                           | 14.7               | 6.6  | 1.7               | 1.6  | 0.7              | 35.9               |
| <u>Probability (%)</u> |                           |                                       |      |      |      |                   |      |                   |      |                                |                    |      |                   |      |                  |                    |
|                        | Medication                | 0.29                                  | 0.16 | 0.16 | 0.24 | 0.53              | 0.17 | 0.10              | 0.45 | 0.64                           | 0.22               | 0.42 | 0.69              | 0.12 | 0.02             | 0.89               |
|                        | BGase                     | 0.43                                  | 0.41 | 0.39 | 0.99 | 0.98              | 0.17 | 0.01              | 0.30 | 0.94                           | 0.79               | 0.54 | 0.77              | 0.13 | 0.01             | 0.16               |
|                        | Medication $\times$ BGase | 0.99                                  | 0.75 | 0.50 | 0.90 | 0.0003            | 0.10 | 0.09              | 0.39 | 0.36                           | 0.01               | 0.84 | 0.002             | 0.06 | 0.04             | 0.001              |

<sup>a-d</sup>Means within a main effect or interaction not sharing a common superscript are significantly different ( $P \leq 0.05$ ).

<sup>1</sup>BGase -  $\beta$ -glucanase; SCFA - short chain fatty acids; Ace - Acetic acid; Pro - Propionic acid; But - Butyric acid; Isov - Isobutyric acid; Val - Valeric acid; Isov - Isovaleric acid; Cap - Caproic acid.

<sup>2</sup>SEM - pooled standard error of mean (n=12 birds per treatment).

392



394

395 **Table 7. Effects of diet medication and  $\beta$ -glucanase on caecal short chain fatty acids of broiler chickens aged 11 days**  
 396 **(Experiment 2)**

| Medication             | BGase <sup>1</sup><br>(%) | SCFA $\mu$ mol/g of wet caecal content |                     |                    |                   |                  |                  |                  |                  | Molar percentage of total SCFA |                   |                   |                  |                  |                   |      |
|------------------------|---------------------------|----------------------------------------|---------------------|--------------------|-------------------|------------------|------------------|------------------|------------------|--------------------------------|-------------------|-------------------|------------------|------------------|-------------------|------|
|                        |                           | Total                                  | Ace                 | Pro                | But               | Isob             | Val              | Isov             | Cap              | Ace                            | Pro               | But               | Isob             | Val              | Isov              | Cap  |
| without                | 0                         | 228.6 <sup>b</sup>                     | 134.1 <sup>b</sup>  | 49.7 <sup>b</sup>  | 22.7 <sup>b</sup> | 7.4 <sup>b</sup> | 4.3 <sup>b</sup> | 7.4 <sup>b</sup> | 2.7 <sup>b</sup> | 58.6                           | 21.8              | 9.9               | 3.2              | 1.7              | 3.3 <sup>a</sup>  | 0.1  |
|                        | 0.1                       | 306.6 <sup>a</sup>                     | 176.5 <sup>a</sup>  | 66.3 <sup>a</sup>  | 30.0 <sup>a</sup> | 9.9 <sup>a</sup> | 9.7 <sup>a</sup> | 9.8 <sup>a</sup> | 4.2 <sup>a</sup> | 57.5                           | 21.6              | 9.7               | 3.2              | 3.1              | 3.2 <sup>ab</sup> | 0.1  |
| with                   | 0                         | 172.8 <sup>b</sup>                     | 100.9 <sup>bc</sup> | 36.4 <sup>bc</sup> | 17.5 <sup>b</sup> | 5.4 <sup>c</sup> | 4.6 <sup>b</sup> | 5.4 <sup>c</sup> | 2.3 <sup>b</sup> | 58.3                           | 21.1              | 10.1              | 3.1              | 2.7              | 3.1 <sup>b</sup>  | 0.1  |
|                        | 0.1                       | 171.2 <sup>b</sup>                     | 98.8 <sup>c</sup>   | 36.7 <sup>c</sup>  | 16.8 <sup>b</sup> | 5.5 <sup>c</sup> | 5.4 <sup>b</sup> | 5.4 <sup>c</sup> | 2.2 <sup>b</sup> | 57.7                           | 21.4              | 9.8               | 3.2              | 3.1              | 3.2 <sup>ab</sup> | 0.1  |
| SEM <sup>2</sup>       |                           | 12.94                                  | 7.41                | 2.83               | 1.25              | 0.42             | 0.58             | 0.41             | 0.19             | 0.21                           | 0.05              | 0.13              | 0.01             | 0.13             | 0.15              | 0.03 |
| Main effects           |                           |                                        |                     |                    |                   |                  |                  |                  |                  |                                |                   |                   |                  |                  |                   |      |
| <i>Medication</i>      |                           |                                        |                     |                    |                   |                  |                  |                  |                  |                                |                   |                   |                  |                  |                   |      |
|                        |                           | 267.6                                  | 155.3               | 58.0               | 26.3              | 8.7              | 7.0              | 8.6              | 3.4              | 58.1                           | 21.7 <sup>a</sup> | 9.8               | 3.2 <sup>a</sup> | 2.4              | 3.2               | 0.1  |
|                        |                           | 172.0                                  | 99.8                | 36.6               | 17.2              | 5.4              | 5.0              | 5.4              | 2.3              | 58.0                           | 21.3 <sup>b</sup> | 9.8               | 3.1 <sup>b</sup> | 2.9              | 3.1               | 0.1  |
| <i>BGase (%)</i>       |                           |                                        |                     |                    |                   |                  |                  |                  |                  |                                |                   |                   |                  |                  |                   |      |
|                        | 0                         | 200.7                                  | 117.5               | 43.1               | 20.1              | 6.4              | 4.5              | 6.4              | 2.5              | 58.5 <sup>a</sup>              | 21.5              | 10.0 <sup>a</sup> | 3.2              | 2.2 <sup>b</sup> | 3.2               | 0.1  |
|                        | 0.1                       | 238.9                                  | 137.7               | 51.5               | 23.4              | 7.7              | 7.5              | 7.6              | 3.2              | 57.6 <sup>b</sup>              | 21.5              | 9.8 <sup>b</sup>  | 3.2              | 3.1 <sup>a</sup> | 3.1               | 0.1  |
| <i>Probability (%)</i> |                           |                                        |                     |                    |                   |                  |                  |                  |                  |                                |                   |                   |                  |                  |                   |      |
|                        | Medication                | <.0001                                 | <.0001              | <.0001             | <.0001            | <.0001           | 0.02             | <.0001           | 0.0002           | 0.68                           | 0.01              | 0.09              | 0.01             | 0.14             | 0.01              | 0.57 |
|                        | BGase                     | 0.02                                   | 0.03                | 0.01               | 0.04              | 0.01             | 0.001            | 0.01             | 0.01             | 0.0004                         | 0.91              | 0.01              | 0.89             | 0.007            | 0.93              | 0.34 |
|                        | Medication $\times$ BGase | 0.01                                   | 0.02                | 0.02               | 0.01              | 0.02             | 0.01             | 0.03             | 0.005            | 0.22                           | 0.17              | 0.64              | 0.08             | 0.16             | 0.05              | 0.38 |

<sup>a-d</sup>Means within a main effect or interaction not sharing a common superscript are significantly different ( $P \leq 0.05$ ).

<sup>1</sup>BGase -  $\beta$ -glucanase; SCFA - short chain fatty acids; Ace - Acetic acid; Pro - Propionic acid; But - Butyric acid; Isob - Isobutyric acid; Val - Valeric acid; Isov - Isovaleric acid; Cap - Caproic acid.

<sup>2</sup>SEM - pooled standard error of mean (n=12 birds per treatment).

397

399

400 **Table 8. Effects of diet medication and  $\beta$ -glucanase on ileal short chain fatty acids of broiler chickens aged 33 days**  
 401 **(Experiment 2)**

| Medication             | BGase <sup>1</sup><br>(%) | SCFA $\mu$ mol/g of wet ileal content |                   |                   |      |                  |                  |                  |                   | Molar percentage of total SCFA |       |      |                  |                  |      |                   |
|------------------------|---------------------------|---------------------------------------|-------------------|-------------------|------|------------------|------------------|------------------|-------------------|--------------------------------|-------|------|------------------|------------------|------|-------------------|
|                        |                           | Total                                 | Ace               | Pro               | But  | Val              | Isov             | Cap              | Lac               | Ace                            | Pro   | But  | Val              | Isov             | Cap  | Lac               |
| without                | 0                         | 115.2                                 | 44.6              | 17.0              | 7.6  | 1.5              | 1.6              | 1.0              | 41.6              | 38.7                           | 14.79 | 6.6  | 1.3              | 1.4              | 0.8  | 36.1              |
|                        | 0.1                       | 125.0                                 | 47.8              | 18.1              | 8.1  | 2.6              | 2.7              | 1.1              | 44.3              | 38.2                           | 14.52 | 6.5  | 2.1              | 2.1              | 0.9  | 35.4              |
| with                   | 0                         | 118.9                                 | 46.0              | 17.5              | 7.8  | 1.7              | 1.9              | 1.0              | 42.7              | 38.7                           | 14.74 | 6.6  | 1.4              | 1.6              | 0.8  | 35.9              |
|                        | 0.1                       | 123.0                                 | 47.1              | 17.9              | 7.5  | 2.6              | 2.6              | 1.1              | 43.8              | 38.3                           | 14.60 | 6.1  | 2.1              | 2.1              | 0.9  | 35.6              |
| SEM <sup>2</sup>       |                           | 1.21                                  | 0.46              | 0.17              | 0.13 | 0.11             | 0.11             | 0.02             | 0.43              | 0.21                           | 0.05  | 0.13 | 0.13             | 0.15             | 0.03 | 0.17              |
| Main effects           |                           |                                       |                   |                   |      |                  |                  |                  |                   |                                |       |      |                  |                  |      |                   |
| <i>Medication</i>      |                           |                                       |                   |                   |      |                  |                  |                  |                   |                                |       |      |                  |                  |      |                   |
|                        |                           | 120.1                                 | 46.2              | 17.6              | 7.8  | 2.1              | 2.1              | 1.0              | 42.9              | 38.5                           | 14.6  | 6.5  | 1.7              | 1.7              | 0.9  | 35.7              |
|                        |                           | 120.9                                 | 46.5              | 17.7              | 7.7  | 2.2              | 2.3              | 1.0              | 43.2              | 38.5                           | 14.6  | 6.3  | 1.8              | 1.8              | 0.9  | 35.7              |
| <i>BGase (%)</i>       |                           |                                       |                   |                   |      |                  |                  |                  |                   |                                |       |      |                  |                  |      |                   |
|                        | 0                         | 117.0 <sup>b</sup>                    | 45.3 <sup>b</sup> | 17.2 <sup>b</sup> | 7.7  | 1.6 <sup>b</sup> | 1.7 <sup>b</sup> | 1.0 <sup>b</sup> | 42.1 <sup>b</sup> | 38.7                           | 14.7  | 6.6  | 1.4 <sup>b</sup> | 1.5 <sup>b</sup> | 0.8  | 36.0 <sup>a</sup> |
|                        | 0.1                       | 124.0 <sup>a</sup>                    | 47.5 <sup>a</sup> | 18.0 <sup>a</sup> | 7.8  | 2.6 <sup>a</sup> | 2.6 <sup>a</sup> | 1.1 <sup>a</sup> | 44.0 <sup>a</sup> | 38.3                           | 14.5  | 6.3  | 2.1 <sup>a</sup> | 2.1 <sup>a</sup> | 0.9  | 35.5 <sup>b</sup> |
| <i>Probability (%)</i> |                           |                                       |                   |                   |      |                  |                  |                  |                   |                                |       |      |                  |                  |      |                   |
|                        | Medication                | 0.73                                  | 0.72              | 0.69              | 0.51 | 0.71             | 0.48             | 0.88             | 0.70              | 0.91                           | 0.88  | 0.30 | 0.77             | 0.53             | 0.82 | 0.91              |
|                        | BGase                     | 0.003                                 | 0.02              | 0.02              | 0.68 | <.0001           | <.0001           | 0.01             | 0.02              | 0.30                           | 0.10  | 0.12 | 0.001            | 0.003            | 0.18 | 0.001             |
|                        | Medication $\times$ BGase | 0.22                                  | 0.24              | 0.34              | 0.15 | 0.61             | 0.40             | 0.92             | 0.34              | 0.76                           | 0.25  | 0.37 | 0.83             | 0.57             | 0.72 | 0.24              |

<sup>a-d</sup>Means within a main effect or interaction not sharing a common superscript are significantly different ( $P \leq 0.05$ ).

<sup>1</sup>BGase -  $\beta$ -glucanase, SCFA - short chain fatty acids; Ace - Acetic acid; Pro - Propionic acid; But - Butyric acid; Isob - Isobutyric acid; Val - Valeric acid; Isov - Isovaleric acid; Cap - Caproic acid.

<sup>2</sup>SEM - pooled standard error of mean (n=18 birds per treatment).

402

404

405 **Table 9. Effects of diet medication and  $\beta$ -glucanase on caecal short chain fatty acids of broiler chickens aged 33 days**  
 406 **(Experiment 2)**

| Medication             | BGase <sup>1</sup><br>(%) | SCFA $\mu\text{mol/g}$ of wet caecal content |                    |      |      |      |      |      |      | Molar percentage of total SCFA |                   |                   |                  |                   |                   |                   |
|------------------------|---------------------------|----------------------------------------------|--------------------|------|------|------|------|------|------|--------------------------------|-------------------|-------------------|------------------|-------------------|-------------------|-------------------|
|                        |                           | Total                                        | Ace                | Pro  | But  | Isob | Val  | Isov | Cap  | Ace                            | Pro               | But               | Isob             | Val               | Isov              | Cap               |
| without                | 0                         | 225.0                                        | 132.2              | 46.5 | 22.5 | 6.9  | 6.8  | 6.8  | 2.9  | 58.8                           | 20.6              | 10.0              | 3.0              | 3.04              | 3.05              | 1.31              |
|                        | 0.1                       | 230.7                                        | 134.9              | 48.1 | 23.0 | 7.2  | 7.1  | 7.1  | 3.0  | 58.5                           | 20.8              | 9.9               | 3.1              | 3.08              | 3.09              | 1.33              |
| with                   | 0                         | 209.8                                        | 122.6              | 43.5 | 21.4 | 6.5  | 6.4  | 6.4  | 2.7  | 58.4                           | 20.7              | 10.2              | 3.1              | 3.07              | 3.07              | 1.32              |
|                        | 0.1                       | 215.5                                        | 125.3              | 45.1 | 22.0 | 6.7  | 6.6  | 6.7  | 2.8  | 58.1                           | 20.9              | 10.2              | 3.1              | 3.10              | 3.11              | 1.33              |
| SEM <sup>2</sup>       |                           | 3.78                                         | 2.17               | 0.82 | 0.38 | 0.12 | 0.12 | 0.12 | 0.05 | 0.21                           | 0.05              | 0.13              | 0.01             | 0.13              | 0.15              | 0.03              |
| Main effects           |                           |                                              |                    |      |      |      |      |      |      |                                |                   |                   |                  |                   |                   |                   |
| <u>Medication</u>      |                           |                                              |                    |      |      |      |      |      |      |                                |                   |                   |                  |                   |                   |                   |
|                        |                           | 227.8 <sup>a</sup>                           | 133.5 <sup>a</sup> | 47.3 | 22.7 | 7.0  | 6.9  | 7.0  | 3.0  | 58.6 <sup>a</sup>              | 20.7              | 10.0 <sup>b</sup> | 3.1              | 3.06              | 3.07              | 1.32              |
|                        |                           | 212.6 <sup>b</sup>                           | 124.0 <sup>b</sup> | 44.3 | 21.7 | 6.6  | 6.5  | 6.5  | 2.8  | 58.2 <sup>b</sup>              | 20.8              | 10.2 <sup>a</sup> | 3.1              | 3.08              | 3.09              | 1.33              |
| <u>BGase (%)</u>       |                           |                                              |                    |      |      |      |      |      |      |                                |                   |                   |                  |                   |                   |                   |
|                        | 0                         | 217.4                                        | 127.4              | 45.0 | 22.0 | 6.7  | 6.6  | 6.6  | 2.8  | 58.6 <sup>a</sup>              | 20.7 <sup>b</sup> | 10.1              | 3.0 <sup>b</sup> | 3.05 <sup>b</sup> | 3.06 <sup>b</sup> | 1.31 <sup>b</sup> |
|                        | 0.1                       | 223.1                                        | 130.1              | 46.6 | 22.5 | 6.9  | 6.8  | 6.9  | 2.9  | 58.3 <sup>b</sup>              | 20.9 <sup>a</sup> | 10.0              | 3.1 <sup>a</sup> | 3.09 <sup>a</sup> | 3.09 <sup>a</sup> | 1.33 <sup>a</sup> |
| <u>Probability (%)</u> |                           |                                              |                    |      |      |      |      |      |      |                                |                   |                   |                  |                   |                   |                   |
|                        | Medication                | 0.04                                         | 0.02               | 0.06 | 0.15 | 0.06 | 0.07 | 0.07 | 0.07 | 0.005                          | 0.20              | 0.02              | 0.14             | 0.08              | 0.09              | 0.12              |
|                        | BGase                     | 0.43                                         | 0.51               | 0.31 | 0.50 | 0.27 | 0.29 | 0.28 | 0.27 | 0.03                           | 0.02              | 0.75              | 0.004            | 0.01              | 0.01              | 0.004             |
|                        | Medication $\times$ BGase | 0.99                                         | 0.99               | 0.99 | 0.93 | 0.98 | 0.99 | 0.99 | 0.94 | 0.93                           | 0.97              | 0.85              | 0.88             | 0.93              | 0.97              | 0.59              |

<sup>a-d</sup>Means within a main effect or interaction not sharing a common superscript are significantly different ( $P \leq 0.05$ ).

<sup>1</sup>BGase -  $\beta$ -glucanase; SCFA - short chain fatty acids; Ace - Acetic acid; Pro - Propionic acid; But - Butyric acid; Isob - Isobutyric acid; Val - Valeric acid; Isov - Isovaleric acid; Cap - Caproic acid.

<sup>2</sup>SEM - pooled standard error of mean (n=18 birds per treatment).

407

408

409 **Table 5. Effects of diet medication and  $\beta$ -glucanase on gastro-intestinal pH of broiler chickens at day 28 (Experiment 1)**

| Medication                              | $\beta$ -glucanase (%) | Crop  | Gizzard | Duodenum          | Jejunum | Ileum | Caeca | Colon |
|-----------------------------------------|------------------------|-------|---------|-------------------|---------|-------|-------|-------|
| without                                 | 0                      | 5.29  | 3.54    | 6.05              | 5.99    | 7.08  | 6.02  | 6.92  |
|                                         | 0.1                    | 5.23  | 3.26    | 6.19              | 6.01    | 7.26  | 6.04  | 7.17  |
| with                                    | 0                      | 5.43  | 3.23    | 6.10              | 5.96    | 7.25  | 5.90  | 7.08  |
|                                         | 0.1                    | 5.20  | 3.17    | 6.21              | 6.05    | 7.27  | 5.93  | 7.13  |
| SEM <sup>1</sup>                        |                        | 0.070 | 0.071   | 0.027             | 0.024   | 0.048 | 0.055 | 0.067 |
| Main effects                            |                        |       |         |                   |         |       |       |       |
| <i>Medication</i>                       |                        |       |         |                   |         |       |       |       |
| without                                 |                        | 5.26  | 3.40    | 6.12              | 5.99    | 7.17  | 6.03  | 7.04  |
| with                                    |                        | 5.31  | 3.20    | 6.16              | 6.00    | 7.26  | 5.91  | 7.11  |
| <i><math>\beta</math>-glucanase (%)</i> |                        |       |         |                   |         |       |       |       |
| 0                                       |                        | 5.36  | 3.39    | 6.08 <sup>b</sup> | 5.97    | 7.16  | 5.96  | 7.00  |
| 0.1                                     |                        | 5.21  | 3.22    | 6.20 <sup>a</sup> | 6.03    | 7.26  | 5.98  | 7.15  |
| <i>Probability</i>                      |                        |       |         |                   |         |       |       |       |
| Medication                              |                        | 0.70  | 0.15    | 0.46              | 0.89    | 0.25  | 0.29  | 0.61  |
| $\beta$ -glucanase                      |                        | 0.29  | 0.21    | 0.01              | 0.16    | 0.20  | 0.82  | 0.22  |
| Medication $\times$ $\beta$ -glucanase  |                        | 0.55  | 0.41    | 0.80              | 0.40    | 0.29  | 0.94  | 0.43  |

<sup>a-b</sup>Means within a main effect or interaction not sharing a common superscript are significantly different ( $P \leq 0.05$ ).

<sup>1</sup>SEM - pooled standard error of mean (n=20 birds per treatment).

411 **Table 11. Effects of diet medication and diet on gastro-intestinal pH of broiler chickens (Experiment 2)**

| Medication         | <sup>1</sup> BGase (%) | pH                |         |                   |         |                   |                   |       |                   |          |         |                   |                   |
|--------------------|------------------------|-------------------|---------|-------------------|---------|-------------------|-------------------|-------|-------------------|----------|---------|-------------------|-------------------|
|                    |                        | d 11              |         |                   |         |                   |                   | d 33  |                   |          |         |                   |                   |
|                    |                        | Crop              | Gizzard | Duodenum          | Jejunum | Ileum             | Caeca             | Crop  | Gizzard           | Duodenum | Jejunum | Ileum             | Caeca             |
| without            | 0                      | 4.78              | 2.81    | 5.88              | 5.91    | 6.29              | 6.36 <sup>a</sup> | 4.94  | 3.67              | 6.15     | 5.93    | 6.50              | 6.22              |
|                    | 0.1                    | 4.62              | 2.41    | 5.99              | 5.92    | 6.61              | 5.78 <sup>b</sup> | 4.84  | 3.44              | 6.01     | 5.99    | 6.94              | 6.03              |
| with               | 0                      | 4.93              | 2.49    | 5.90              | 5.90    | 6.62              | 5.70 <sup>b</sup> | 5.01  | 3.75              | 6.18     | 5.97    | 7.20              | 6.19              |
|                    | 0.1                    | 5.09              | 2.55    | 6.06              | 6.01    | 6.97              | 5.77 <sup>b</sup> | 4.91  | 3.28              | 6.18     | 5.99    | 7.39              | 5.96              |
| SEM <sup>2</sup>   |                        | 0.052             | 0.057   | 0.024             | 0.018   | 0.053             | 0.061             | 0.052 | 0.057             | 0.024    | 0.018   | 0.053             | 0.061             |
| Main effects       |                        |                   |         |                   |         |                   |                   |       |                   |          |         |                   |                   |
| <i>Medication</i>  |                        |                   |         |                   |         |                   |                   |       |                   |          |         |                   |                   |
|                    |                        | 4.70 <sup>b</sup> | 2.61    | 5.94              | 5.92    | 6.45 <sup>b</sup> | 6.07              | 4.89  | 3.55              | 6.08     | 5.96    | 6.72 <sup>b</sup> | 6.12              |
|                    |                        | 5.01 <sup>a</sup> | 2.52    | 5.98              | 5.96    | 6.80 <sup>a</sup> | 5.74              | 4.96  | 3.52              | 6.18     | 5.98    | 7.30 <sup>a</sup> | 6.08              |
| <i>BGase (%)</i>   |                        |                   |         |                   |         |                   |                   |       |                   |          |         |                   |                   |
|                    | 0                      | 4.85              | 2.65    | 5.89 <sup>b</sup> | 5.91    | 6.45 <sup>b</sup> | 6.03              | 4.97  | 3.71 <sup>a</sup> | 6.16     | 5.95    | 6.85 <sup>b</sup> | 6.21 <sup>a</sup> |
|                    | 0.1                    | 4.86              | 2.48    | 6.03 <sup>a</sup> | 5.97    | 6.79 <sup>a</sup> | 5.78              | 4.87  | 3.36 <sup>b</sup> | 6.09     | 5.99    | 7.17 <sup>a</sup> | 5.99 <sup>b</sup> |
| <i>Probability</i> |                        |                   |         |                   |         |                   |                   |       |                   |          |         |                   |                   |
|                    | Medication             | 0.001             | 0.41    | 0.33              | 0.25    | 0.0001            | 0.001             | 0.46  | 0.71              | 0.09     | 0.61    | <.0001            | 0.65              |
|                    | BGase                  | 0.97              | 0.12    | 0.004             | 0.10    | 0.0002            | 0.01              | 0.29  | 0.001             | 0.22     | 0.28    | 0.0007            | 0.04              |
|                    | Medication × BGase     | 0.10              | 0.04    | 0.66              | 0.14    | 0.84              | 0.002             | 0.98  | 0.24              | 0.21     | 0.61    | 0.16              | 0.88              |

<sup>a-b</sup>Means within a main effect or interaction not sharing a common superscript are significantly different ( $P \leq 0.05$ ).

<sup>1</sup>BGase -  $\beta$ -glucanase; <sup>2</sup>SEM - pooled standard error of mean (d 11; n=12 birds per treatment, d 33; n=18 birds per treatment).

## 413 **Gastro-intestinal wall histomorphology**

414           Gastrointestinal wall histology was examined only in Experiment 2 (Table 12).

415   Treatment effects were not prevalent nor consistent between ages. At d 11, medication decreased  
416   the crypt depth, while  $\beta$ -glucanase decreased villi width. At 33 d, medication increased the  
417   number of acidic and decreased the number of mixed goblet cells per villus. The medication also  
418   increased the villi height to crypt depth ratio.

**Table 12. Effects of medication and  $\beta$ -glucanase on histomorphology parameters in the ileum of broiler chickens (Experiment 2)**

| Medication         | BGase <sup>1</sup><br>(%) | d 11                          |                              |                                  |         |       |                              |                                    | d 33                          |                              |                                  |         |                |                              |                                    |
|--------------------|---------------------------|-------------------------------|------------------------------|----------------------------------|---------|-------|------------------------------|------------------------------------|-------------------------------|------------------------------|----------------------------------|---------|----------------|------------------------------|------------------------------------|
|                    |                           | Villi<br>height<br>( $\mu$ m) | Villi<br>width<br>( $\mu$ m) | Number of goblet<br>cells/villus |         |       | Crypt<br>depth<br>( $\mu$ m) | Villi<br>height:<br>Crypt<br>depth | Villi<br>height<br>( $\mu$ m) | Villi<br>width<br>( $\mu$ m) | Number of goblet<br>cells/villus |         |                | Crypt<br>depth<br>( $\mu$ m) | Villi<br>height:<br>Crypt<br>depth |
|                    |                           |                               |                              | Acidic                           | Neutral | Mixed |                              |                                    |                               |                              | Acidic                           | Neutral | Mixed          |                              |                                    |
| without            | 0                         | 402                           | 101                          | 30                               | 12      | 4     | 136                          | 3.1                                | 657                           | 117                          | 77                               | 20      | 7              | 134                          | 5                                  |
|                    | 0.1                       | 446                           | 92                           | 35                               | 17      | 6     | 139                          | 3.2                                | 656                           | 115                          | 63                               | 20      | 9              | 160                          | 4                                  |
| with               | 0                         | 405                           | 104                          | 41                               | 11      | 5     | 107                          | 3.7                                | 734                           | 113                          | 87                               | 20      | 6              | 136                          | 5                                  |
|                    | 0.1                       | 383                           | 88                           | 37                               | 15      | 4     | 121                          | 3.2                                | 746                           | 124                          | 91                               | 25      | 3              | 143                          | 5                                  |
| SEM <sup>2</sup>   |                           | 22.27                         | 2.20                         | 2.59                             | 1.30    | 0.46  | 5.21                         | 0.19                               | 23.26                         | 2.60                         | 4.44                             | 1.74    | 0.96           | 4.61                         | 0.18                               |
| Main effects       |                           |                               |                              |                                  |         |       |                              |                                    |                               |                              |                                  |         |                |                              |                                    |
| <u>Medication</u>  |                           |                               |                              |                                  |         |       |                              |                                    |                               |                              |                                  |         |                |                              |                                    |
|                    |                           | 424                           | 97                           | 32                               | 14      | 5     | 137 <sup>a</sup>             | 3.1                                | 656                           | 116                          | 70 <sup>b</sup>                  | 20      | 8 <sup>a</sup> | 147                          | 4 <sup>b</sup>                     |
|                    |                           | 394                           | 96                           | 39                               | 13      | 5     | 114 <sup>b</sup>             | 3.4                                | 740                           | 118                          | 89 <sup>a</sup>                  | 22      | 4 <sup>b</sup> | 140                          | 5 <sup>a</sup>                     |
| <u>BGase (%)</u>   |                           |                               |                              |                                  |         |       |                              |                                    |                               |                              |                                  |         |                |                              |                                    |
|                    | 0                         | 404                           | 102 <sup>a</sup>             | 35                               | 11      | 5     | 121                          | 3.4                                | 695                           | 115                          | 82                               | 20      | 6              | 135                          | 5                                  |
|                    | 0.1                       | 414                           | 90 <sup>b</sup>              | 36                               | 16      | 5     | 130                          | 3.2                                | 701                           | 120                          | 77                               | 22      | 6              | 151                          | 4                                  |
| <u>Probability</u> |                           |                               |                              |                                  |         |       |                              |                                    |                               |                              |                                  |         |                |                              |                                    |
|                    | Medication                | 0.54                          | 0.91                         | 0.21                             | 0.56    | 0.82  | 0.01                         | 0.41                               | 0.07                          | 0.62                         | 0.03                             | 0.48    | 0.04           | 0.39                         | 0.03                               |
|                    | BGase                     | 0.83                          | 0.01                         | 0.96                             | 0.08    | 0.96  | 0.32                         | 0.58                               | 0.90                          | 0.29                         | 0.52                             | 0.51    | 0.98           | 0.06                         | 0.13                               |
|                    | Medication $\times$ BGase | 0.50                          | 0.43                         | 0.39                             | 0.94    | 0.22  | 0.53                         | 0.43                               | 0.88                          | 0.17                         | 0.28                             | 0.59    | 0.21           | 0.25                         | 0.17                               |

<sup>a-b</sup> Means within a main effect or interaction not sharing a common superscript are significantly different ( $P \leq 0.05$ ).

<sup>1</sup>BGase -  $\beta$ -glucanase.

<sup>2</sup>SEM - pooled standard error of mean (n=6 birds per treatment).

## 421 **Gastro-intestinal tract morphology**

422 In Experiment 1, interactions were not found between BGase and medication for empty  
423 weights and lengths of the digestive tract sections, except for crop weight (Table 13). Crop  
424 weight was lower with enzyme use when the birds were fed a non-medicated diet, but the  
425 enzyme had no effect when the diets were medicated. Both ileum and colon weights were lower  
426 when the enzyme was fed. Crop content weight was higher, and duodenal and ileal content  
427 weights were lower when 0.1% BGase was fed (Table 14). Interactions were found for the  
428 content weights of the gizzard, jejunum and small intestine. The gizzard content weight tended to  
429 be higher and lower with enzyme use in birds fed non-medicated and medicated diets,  
430 respectively. Beta-glucanase resulted in lower jejunal and small intestinal content weights in the  
431 absence of dietary antibiotics but had no effect when the medication was used.

432 Interactions were found between medication and BGase for the empty proportional  
433 weights of the duodenum, jejunum, small intestine and caeca at d 11 (Table 15). For all  
434 segments, feeding diets without medication or enzyme resulted in the heaviest weights. Using an  
435 enzyme in nonmedicated diets reduced the segment weights (jejunum and small intestine), while  
436 enzyme use in diets with medication did not affect empty weight. Feeding an enzyme reduced  
437 the proventriculus empty weight. The length of the jejunum, ileum, small intestine and caeca  
438 were shorter with medication use. The dietary enzyme reduced the length of the jejunum and the  
439 small intestine. The content weight of the small intestine was lower, with the addition of BGase  
440 to the diets without medication (Table 16). Medication reduced the content weight of the crop  
441 and caeca, while BGase reduced the content weight of the gizzard, jejunum, ileum and colon.  
442 Diet medication reduced the pancreas weight, and diet enzyme increased liver weight and  
443 decreased pancreas weight.



444 Diet medication decreased the empty proportional weights of the duodenum, jejunum,  
445 ileum, small intestine and colon, and decreased the lengths of the same digestive tract segments  
446 in 33 d old broilers (Table 17). Dietary BGase resulted in lower empty weights for the crop,  
447 ileum and small intestine; enzyme also reduced the lengths of the duodenum and ileum.  
448 Interactions between the main effects were found for the empty jejunum weight, and the lengths  
449 of the jejunum and small intestine. For the interactions, enzyme use resulted in smaller tissues  
450 when non-medicated diets were fed, but had no effect when diets contained medication.  
451 Medication resulted in smaller digestive tract segments in these interactions.

452 The content weights of the duodenum and colon decreased with the use of BGase at d 33  
453 (Table 18). Medication similarly decreased the content weight of the duodenum. Interactions  
454 between medication and enzyme were found for the content weights of the gizzard ( $P = 0.06$ ),  
455 jejunum, ileum, small intestine and colon ( $P = 0.06$ ). For the jejunum, ileum, small intestine and  
456 colon segments, enzyme reduced weights in non-medicated diets but did not affect content  
457 weights in the presence of medication. For gizzard content weights, enzyme increased and  
458 decreased values in diets without and with medication, respectively. An interaction was also  
459 found for liver weight. The largest weight was found for the birds fed diets with no medication or  
460 enzyme; the addition of enzyme to the unmedicated diet resulted in lower weight, and the liver  
461 weights for medicated diets were smallest and unaffected by enzyme in the diet.

462

463 **Table 13. Effects of diet medication and  $\beta$ -glucanase on gastro-intestinal tissue weights and lengths (proportional to body**  
464 **weight) of broiler chickens at d 28 (Experiment 1)**

| Medication         | BGase <sup>1</sup><br>(%) | Empty weight (%)   |        |         |       |         |                   |       |       |                   | Length (cm/100g) |         |       |       |       |       |
|--------------------|---------------------------|--------------------|--------|---------|-------|---------|-------------------|-------|-------|-------------------|------------------|---------|-------|-------|-------|-------|
|                    |                           | Crop               | Proven | Gizzard | Duo   | Jejunum | Ileum             | SI    | Caeca | Colon             | Duo              | Jejunum | Ileum | SI    | Caeca | Colon |
| without            | 0                         | 0.34 <sup>a</sup>  | 0.38   | 1.20    | 0.73  | 1.37    | 1.00              | 3.08  | 0.36  | 0.17              | 1.73             | 4.22    | 4.18  | 10.07 | 1.67  | 0.41  |
|                    | 0.1                       | 0.29 <sup>b</sup>  | 0.38   | 1.32    | 0.73  | 1.30    | 0.91              | 2.94  | 0.37  | 0.14              | 1.75             | 4.01    | 4.11  | 9.87  | 1.69  | 0.39  |
| with               | 0                         | 0.30 <sup>ab</sup> | 0.43   | 1.31    | 0.71  | 1.31    | 0.97              | 2.99  | 0.36  | 0.15              | 1.80             | 4.24    | 4.35  | 10.39 | 1.73  | 0.42  |
|                    | 0.1                       | 0.31 <sup>ab</sup> | 0.38   | 1.33    | 0.74  | 1.28    | 0.93              | 2.94  | 0.37  | 0.15              | 1.79             | 4.23    | 4.29  | 10.28 | 1.68  | 0.42  |
| SEM <sup>2</sup>   |                           | 0.006              | 0.009  | 0.020   | 0.008 | 0.018   | 0.012             | 0.030 | 0.009 | 0.003             | 0.023            | 0.056   | 0.059 | 0.118 | 0.026 | 0.007 |
| Main effects       |                           |                    |        |         |       |         |                   |       |       |                   |                  |         |       |       |       |       |
| <u>Medication</u>  |                           |                    |        |         |       |         |                   |       |       |                   |                  |         |       |       |       |       |
|                    |                           | 0.32               | 0.38   | 1.26    | 0.73  | 1.33    | 0.96              | 3.01  | 0.36  | 0.16              | 1.74             | 4.12    | 4.15  | 9.97  | 1.68  | 0.40  |
|                    |                           | 0.30               | 0.40   | 1.32    | 0.73  | 1.30    | 0.95              | 2.97  | 0.37  | 0.15              | 1.79             | 4.23    | 4.32  | 10.33 | 1.71  | 0.42  |
| <u>BGase (%)</u>   |                           |                    |        |         |       |         |                   |       |       |                   |                  |         |       |       |       |       |
|                    | 0                         | 0.32               | 0.41   | 1.25    | 0.72  | 1.34    | 0.98 <sup>a</sup> | 3.04  | 0.36  | 0.16 <sup>a</sup> | 1.76             | 4.23    | 4.27  | 10.23 | 1.70  | 0.42  |
|                    | 0.1                       | 0.30               | 0.38   | 1.32    | 0.74  | 1.29    | 0.92 <sup>b</sup> | 2.94  | 0.37  | 0.15 <sup>b</sup> | 1.77             | 4.12    | 4.20  | 10.07 | 1.68  | 0.41  |
| <u>Probability</u> |                           |                    |        |         |       |         |                   |       |       |                   |                  |         |       |       |       |       |
|                    | Medication                | 0.36               | 0.18   | 0.10    | 0.83  | 0.34    | 0.61              | 0.45  | 0.84  | 0.58              | 0.21             | 0.29    | 0.13  | 0.11  | 0.61  | 0.16  |
|                    | BGase                     | 0.29               | 0.10   | 0.07    | 0.30  | 0.14    | 0.005             | 0.12  | 0.41  | 0.01              | 0.83             | 0.32    | 0.56  | 0.49  | 0.75  | 0.44  |
|                    | Medication $\times$ BGase | 0.007              | 0.13   | 0.18    | 0.47  | 0.57    | 0.31              | 0.40  | 0.98  | 0.08              | 0.75             | 0.35    | 0.97  | 0.82  | 0.48  | 0.64  |

<sup>a-b</sup>Means within a main effect or interaction not sharing a common superscript are significantly different ( $P \leq 0.05$ ).

<sup>1</sup>BGase -  $\beta$ -glucanase; Proven - proventriculus; Duo - duodenum; SI - small intestine.

<sup>2</sup>SEM - pooled standard error of mean (n=20 birds per treatment).

466 **Table 14. Effects of diet medication and  $\beta$ -glucanase on gastro-intestinal content and organ weights as a percentage of body**  
 467 **weight of broiler chickens at d 28 (Experiment 1)**

| Medication         | BGase <sup>1</sup><br>(%) | Content           |        |                    |                   |                    |                   |                    |       |       | Weight |        |          |
|--------------------|---------------------------|-------------------|--------|--------------------|-------------------|--------------------|-------------------|--------------------|-------|-------|--------|--------|----------|
|                    |                           | Crop              | Proven | Gizzard            | Duo               | Jejunum            | Ileum             | SI                 | Caeca | Colon | Liver  | Spleen | Pancreas |
| without            | 0                         | 0.28              | 0.03   | 0.93 <sup>b</sup>  | 0.09              | 1.03 <sup>a</sup>  | 1.17              | 2.29 <sup>a</sup>  | 0.30  | 0.19  | 2.40   | 0.10   | 0.24     |
|                    | 0.1                       | 0.52              | 0.03   | 1.14 <sup>b</sup>  | 0.07              | 0.74 <sup>b</sup>  | 0.90              | 1.69 <sup>b</sup>  | 0.24  | 0.16  | 2.50   | 0.09   | 0.23     |
| with               | 0                         | 0.33              | 0.11   | 1.53 <sup>a</sup>  | 0.09              | 0.85 <sup>ab</sup> | 1.11              | 2.05 <sup>ab</sup> | 0.27  | 0.21  | 2.43   | 0.10   | 0.26     |
|                    | 0.1                       | 0.45              | 0.03   | 1.31 <sup>ab</sup> | 0.07              | 0.87 <sup>ab</sup> | 1.06              | 2.00 <sup>ab</sup> | 0.26  | 0.19  | 2.40   | 0.09   | 0.25     |
| SEM <sup>2</sup>   |                           | 0.066             | 0.017  | 0.058              | 0.005             | 0.028              | 0.035             | 0.056              | 0.014 | 0.009 | 0.029  | 0.003  | 0.005    |
| Main effects       |                           |                   |        |                    |                   |                    |                   |                    |       |       |        |        |          |
| <u>Medication</u>  |                           |                   |        |                    |                   |                    |                   |                    |       |       |        |        |          |
| without            |                           | 0.40              | 0.03   | 1.03               | 0.08              | 0.88               | 1.03              | 1.99               | 0.27  | 0.18  | 2.45   | 0.10   | 0.24     |
| with               |                           | 0.39              | 0.07   | 1.42               | 0.08              | 0.86               | 1.09              | 2.02               | 0.26  | 0.20  | 2.41   | 0.09   | 0.25     |
| <u>BGase (%)</u>   |                           |                   |        |                    |                   |                    |                   |                    |       |       |        |        |          |
| 0                  |                           | 0.30 <sup>b</sup> | 0.07   | 1.23               | 0.09 <sup>a</sup> | 0.94               | 1.14 <sup>a</sup> | 2.17               | 0.28  | 0.20  | 2.41   | 0.10   | 0.25     |
| 0.1                |                           | 0.48 <sup>a</sup> | 0.03   | 1.22               | 0.07 <sup>b</sup> | 0.80               | 0.98 <sup>b</sup> | 1.84               | 0.25  | 0.18  | 2.45   | 0.92   | 0.24     |
| <u>Probability</u> |                           |                   |        |                    |                   |                    |                   |                    |       |       |        |        |          |
| Medication         |                           | 0.92              | 0.22   | 0.0005             | 0.60              | 0.63               | 0.43              | 0.74               | 0.77  | 0.14  | 0.50   | 0.72   | 0.05     |
| BGase              |                           | 0.04              | 0.25   | 0.93               | 0.01              | 0.007              | 0.02              | 0.002              | 0.21  | 0.19  | 0.45   | 0.20   | 0.16     |
| Medication × BGase |                           | 0.56              | 0.21   | 0.04               | 0.90              | 0.002              | 0.11              | 0.01               | 0.39  | 0.74  | 0.22   | 0.74   | 0.82     |

<sup>a-b</sup>Means within a main effect or interaction not sharing a common superscript are significantly different ( $P \leq 0.05$ ).

<sup>1</sup>BGase -  $\beta$ -glucanase; Proven - proventriculus; Duo - duodenum; SI - small intestine.

<sup>2</sup>SEM - pooled standard error of mean (n=20 birds per treatment).

469 **Table 15. Effects of diet medication and  $\beta$ -glucanase on gastro-intestinal tissue weights and lengths (proportional to body**  
 470 **weight) of broiler chickens at day 11**

| Medication         | BGase <sup>1</sup><br>(%) | Empty weight (%) |                   |         |                    |                   |                   |                    |                    |       | Length (cm/100g) |                    |                    |                    |                   |       |
|--------------------|---------------------------|------------------|-------------------|---------|--------------------|-------------------|-------------------|--------------------|--------------------|-------|------------------|--------------------|--------------------|--------------------|-------------------|-------|
|                    |                           | Crop             | Proven            | Gizzard | Duodenum           | Jejunum           | Ileum             | SI                 | Caeca              | Colon | Duodenum         | Jejunum            | Ileum              | SI                 | Caeca             | Colon |
| without            | 0                         | 0.53             | 0.83              | 2.63    | 1.92 <sup>a</sup>  | 2.97 <sup>a</sup> | 2.11              | 7.00 <sup>a</sup>  | 0.66 <sup>a</sup>  | 0.26  | 7.22             | 17.42              | 15.66              | 40.29              | 5.40              | 1.39  |
|                    | 0.1                       | 0.48             | 0.79              | 2.61    | 1.77 <sup>ab</sup> | 2.63 <sup>b</sup> | 1.88              | 6.27 <sup>b</sup>  | 0.60 <sup>ab</sup> | 0.22  | 6.90             | 15.16              | 14.97              | 37.02              | 5.24              | 1.36  |
| with               | 0                         | 0.46             | 0.87              | 2.69    | 1.51 <sup>b</sup>  | 2.40 <sup>b</sup> | 1.74              | 5.65 <sup>c</sup>  | 0.50 <sup>b</sup>  | 0.25  | 7.13             | 15.45              | 13.56              | 36.14              | 4.62              | 1.40  |
|                    | 0.1                       | 0.48             | 0.77              | 2.54    | 1.69 <sup>ab</sup> | 2.67 <sup>b</sup> | 1.78              | 6.13 <sup>bc</sup> | 0.62 <sup>ab</sup> | 0.25  | 6.11             | 14.64              | 13.75              | 34.49              | 4.99              | 1.34  |
| SEM <sup>2</sup>   |                           | 0.018            | 0.018             | 0.043   | 0.039              | 0.053             | 0.043             | 0.109              | 0.020              | 0.006 | 0.219            | 0.273              | 0.329              | 0.584              | 0.121             | 0.035 |
| Main effects       |                           |                  |                   |         |                    |                   |                   |                    |                    |       |                  |                    |                    |                    |                   |       |
| <i>Medication</i>  |                           |                  |                   |         |                    |                   |                   |                    |                    |       |                  |                    |                    |                    |                   |       |
| without            |                           | 0.50             | 0.81              | 2.62    | 1.84               | 2.80              | 2.00 <sup>a</sup> | 6.64               | 0.63               | 0.24  | 7.06             | 16.29 <sup>a</sup> | 15.31 <sup>a</sup> | 38.65 <sup>a</sup> | 5.32 <sup>a</sup> | 1.37  |
| with               |                           | 0.47             | 0.82              | 2.62    | 1.60               | 2.54              | 1.76 <sup>b</sup> | 5.89               | 0.56               | 0.25  | 6.62             | 15.05 <sup>b</sup> | 13.65 <sup>b</sup> | 35.31 <sup>b</sup> | 4.80 <sup>b</sup> | 1.37  |
| <i>BGase (%)</i>   |                           |                  |                   |         |                    |                   |                   |                    |                    |       |                  |                    |                    |                    |                   |       |
| 0                  |                           | 0.49             | 0.85 <sup>a</sup> | 2.66    | 1.72               | 2.69              | 1.93              | 6.33               | 0.58               | 0.25  | 7.17             | 16.43 <sup>a</sup> | 14.61              | 38.21 <sup>a</sup> | 5.01              | 1.39  |
| 0.1                |                           | 0.48             | 0.78 <sup>b</sup> | 2.58    | 1.73               | 2.65              | 1.83              | 6.20               | 0.61               | 0.24  | 6.50             | 14.90 <sup>b</sup> | 14.36              | 35.76 <sup>b</sup> | 5.12              | 1.35  |
| <i>Probability</i> |                           |                  |                   |         |                    |                   |                   |                    |                    |       |                  |                    |                    |                    |                   |       |
| Medication         |                           | 0.16             | 0.77              | 0.92    | 0.0009             | 0.001             | 0.003             | <.0001             | 0.07               | 0.44  | 0.26             | 0.004              | 0.01               | 0.001              | 0.03              | 0.92  |
| BGase              |                           | 0.70             | 0.04              | 0.29    | 0.90               | 0.62              | 0.19              | 0.42               | 0.43               | 0.11  | 0.09             | 0.0007             | 0.69               | 0.01               | 0.65              | 0.41  |
| Medication × BGase |                           | 0.15             | 0.42              | 0.41    | 0.02               | 0.0004            | 0.08              | 0.0005             | 0.01               | 0.15  | 0.36             | 0.08               | 0.48               | 0.40               | 0.26              | 0.74  |

<sup>a-b</sup>Means within a main effect or interaction not sharing a common superscript are significantly different ( $P \leq 0.05$ ).

<sup>1</sup>BGase -  $\beta$ -glucanase; Proven - proventriculus; SI - small intestine.

<sup>2</sup>SEM - pooled standard error of mean (n=12 birds per treatment).

472

473 **Table 16. Effects of diet medication and  $\beta$ -glucanase on gastro-intestinal content and organ weights as a percentage of body**  
 474 **weight of broiler chickens at day 11**

| Medication         | BGase <sup>1</sup><br>(%) | Content           |                |                   |          |                   |                   |                    |                   |                   | Weight            |        |                   |
|--------------------|---------------------------|-------------------|----------------|-------------------|----------|-------------------|-------------------|--------------------|-------------------|-------------------|-------------------|--------|-------------------|
|                    |                           | Crop              | Proventriculus | Gizzard           | Duodenum | Jejunum           | Ileum             | SI                 | Caeca             | Colon             | Liver             | Spleen | Pancreas          |
| without            | 0                         | 0.48              | 0.06           | 0.89              | 0.08     | 0.59              | 0.60              | 1.26 <sup>a</sup>  | 0.08              | 0.06              | 4.05              | 0.13   | 0.57              |
|                    | 0.1                       | 0.54              | 0.05           | 0.81              | 0.05     | 0.45              | 0.41              | 0.89 <sup>c</sup>  | 0.11              | 0.04              | 4.74              | 0.11   | 0.50              |
| with               | 0                         | 0.29              | 0.11           | 0.99              | 0.05     | 0.53              | 0.51              | 1.08 <sup>b</sup>  | 0.07              | 0.07              | 4.19              | 0.13   | 0.50              |
|                    | 0.1                       | 0.37              | 0.06           | 0.73              | 0.04     | 0.45              | 0.44              | 0.93 <sup>bc</sup> | 0.07              | 0.05              | 4.48              | 0.12   | 0.49              |
| SEM <sup>2</sup>   |                           | 0.035             | 0.008          | 0.034             | 0.006    | 0.018             | 0.018             | 0.727              | 0.006             | 0.004             | 0.070             | 0.004  | 0.011             |
| Main effects       |                           |                   |                |                   |          |                   |                   |                    |                   |                   |                   |        |                   |
| <i>Medication</i>  |                           |                   |                |                   |          |                   |                   |                    |                   |                   |                   |        |                   |
|                    |                           | 0.51 <sup>a</sup> | 0.05           | 0.85              | 0.06     | 0.52              | 0.50              | 1.08               | 0.09 <sup>a</sup> | 0.05              | 4.39              | 0.12   | 0.53 <sup>a</sup> |
|                    |                           | 0.33 <sup>b</sup> | 0.08           | 0.86              | 0.04     | 0.49              | 0.47              | 1.00               | 0.07 <sup>b</sup> | 0.06              | 4.34              | 0.12   | 0.50 <sup>b</sup> |
| <i>BGase (%)</i>   |                           |                   |                |                   |          |                   |                   |                    |                   |                   |                   |        |                   |
|                    | 0                         | 0.38              | 0.08           | 0.94 <sup>a</sup> | 0.06     | 0.56 <sup>a</sup> | 0.55 <sup>a</sup> | 1.17               | 0.07              | 0.07 <sup>a</sup> | 4.12 <sup>b</sup> | 0.13   | 0.54 <sup>a</sup> |
|                    | 0.1                       | 0.46              | 0.05           | 0.77 <sup>b</sup> | 0.04     | 0.45 <sup>b</sup> | 0.42 <sup>b</sup> | 0.91               | 0.09              | 0.04 <sup>b</sup> | 4.61 <sup>a</sup> | 0.11   | 0.50 <sup>b</sup> |
| <i>Probability</i> |                           |                   |                |                   |          |                   |                   |                    |                   |                   |                   |        |                   |
|                    | Medication                | 0.008             | 0.08           | 0.89              | 0.09     | 0.29              | 0.36              | 0.11               | 0.03              | 0.09              | 0.63              | 0.64   | 0.04              |
|                    | BGase                     | 0.26              | 0.08           | 0.009             | 0.06     | <.0001            | 0.0001            | <.0001             | 0.20              | 0.005             | 0.0002            | 0.10   | 0.03              |
|                    | Medication $\times$ BGase | 0.85              | 0.15           | 0.15              | 0.22     | 0.16              | 0.06              | 0.02               | 0.22              | 0.91              | 0.09              | 0.57   | 0.13              |

<sup>a-b</sup>Means within a main effect or interaction not sharing a common superscript are significantly different ( $P \leq 0.05$ ).

<sup>1</sup>BGase -  $\beta$ -glucanase; SI - small intestine

<sup>2</sup>SEM - pooled standard error of mean (n=12 birds per treatment).

476

477 **Table 17. Effects of diet medication and  $\beta$ -glucanase on gastro-intestinal tissue weights and lengths (proportional to body**  
 478 **weight) of broiler chickens at day 33**

| Medication         | BGase <sup>1</sup><br>(%) | Empty weight (%)  |        |         |                   |                   |                   |                   |       |                   | Length (cm/100g)  |                   |                   |                    |       |                   |
|--------------------|---------------------------|-------------------|--------|---------|-------------------|-------------------|-------------------|-------------------|-------|-------------------|-------------------|-------------------|-------------------|--------------------|-------|-------------------|
|                    |                           | Crop              | Proven | Gizzard | Duo               | Jejunum           | Ileum             | SI                | Caeca | Colon             | Duo               | Jejunum           | Ileum             | SI                 | Caeca | Colon             |
| without            | 0                         | 0.30              | 0.38   | 1.12    | 0.87              | 1.64 <sup>a</sup> | 1.13              | 3.64              | 0.37  | 0.17              | 1.80              | 4.49 <sup>a</sup> | 4.42              | 10.70 <sup>a</sup> | 0.63  | 0.41              |
|                    | 0.1                       | 0.29              | 0.39   | 1.23    | 0.86              | 1.53 <sup>a</sup> | 1.00              | 3.38              | 0.38  | 0.15              | 1.63              | 3.88 <sup>b</sup> | 3.86              | 9.37 <sup>b</sup>  | 0.71  | 0.38              |
| with               | 0                         | 0.33              | 0.44   | 1.14    | 0.71              | 1.24 <sup>b</sup> | 0.98              | 2.92              | 0.35  | 0.15              | 1.57              | 3.43 <sup>c</sup> | 3.36              | 8.35 <sup>c</sup>  | 0.60  | 0.32              |
|                    | 0.1                       | 0.27              | 0.36   | 1.16    | 0.70              | 1.28 <sup>b</sup> | 0.92              | 2.90              | 0.37  | 0.15              | 1.47              | 3.40 <sup>c</sup> | 3.34              | 8.20 <sup>c</sup>  | 0.64  | 0.35              |
| SEM <sup>2</sup>   |                           | 0.006             | 0.015  | 0.022   | 0.014             | 0.029             | 0.018             | 0.051             | 0.008 | 0.004             | 0.029             | 0.078             | 0.089             | 0.172              | 0.031 | 0.010             |
| Main effects       |                           |                   |        |         |                   |                   |                   |                   |       |                   |                   |                   |                   |                    |       |                   |
| <i>Medication</i>  |                           |                   |        |         |                   |                   |                   |                   |       |                   |                   |                   |                   |                    |       |                   |
| without            |                           | 0.29              | 0.38   | 1.17    | 0.86 <sup>a</sup> | 1.58              | 1.06 <sup>a</sup> | 3.51 <sup>a</sup> | 0.38  | 0.16 <sup>a</sup> | 1.71 <sup>a</sup> | 4.19              | 4.14 <sup>a</sup> | 10.03              | 0.67  | 0.40 <sup>a</sup> |
| with               |                           | 0.30              | 0.40   | 1.15    | 0.70 <sup>b</sup> | 1.26              | 0.95 <sup>b</sup> | 2.91 <sup>b</sup> | 0.36  | 0.15 <sup>b</sup> | 1.52 <sup>b</sup> | 3.41              | 3.35 <sup>b</sup> | 8.27               | 0.62  | 0.33 <sup>b</sup> |
| <i>BGase (%)</i>   |                           |                   |        |         |                   |                   |                   |                   |       |                   |                   |                   |                   |                    |       |                   |
| 0                  |                           | 0.31 <sup>a</sup> | 0.41   | 1.13    | 0.79              | 1.44              | 1.05 <sup>a</sup> | 3.28 <sup>a</sup> | 0.36  | 0.16              | 1.68 <sup>a</sup> | 3.96              | 3.89 <sup>a</sup> | 9.52               | 0.62  | 0.37              |
| 0.1                |                           | 0.28 <sup>b</sup> | 0.38   | 1.20    | 0.78              | 1.40              | 0.96 <sup>b</sup> | 3.14 <sup>b</sup> | 0.38  | 0.15              | 1.55 <sup>b</sup> | 3.64              | 3.60 <sup>b</sup> | 8.78               | 0.67  | 0.36              |
| <i>Probability</i> |                           |                   |        |         |                   |                   |                   |                   |       |                   |                   |                   |                   |                    |       |                   |
| Medication         |                           | 0.80              | 0.57   | 0.62    | <.0001            | <.0001            | 0.0005            | <.0001            | 0.36  | 0.01              | 0.0003            | <.0001            | <.0001            | <.0001             | 0.15  | 0.0004            |
| BGase              |                           | 0.005             | 0.27   | 0.12    | 0.55              | 0.33              | 0.005             | 0.04              | 0.22  | 0.11              | 0.01              | 0.009             | 0.04              | 0.004              | 0.11  | 0.88              |
| Medication × BGase |                           | 0.12              | 0.20   | 0.31    | 0.83              | 0.05              | 0.28              | 0.10              | 0.88  | 0.15              | 0.47              | 0.01              | 0.06              | 0.02               | 0.68  | 0.09              |

<sup>a-c</sup>Means within a main effect or interaction not sharing a common superscript are significantly different ( $P \leq 0.05$ ).

<sup>1</sup>BGase -  $\beta$ -glucanase; Proven - proventriculus; Duo - duodenum; SI - small intestine.

<sup>2</sup>SEM - pooled standard error of mean (n=18 birds per treatment).

479

481

482 **Table 18. Effects of diet medication and  $\beta$ -glucanase on gastro-intestinal content and organ weights as a percentage of body**  
 483 **weight of broiler chickens at day 33**

| Medication         | BGase <sup>1</sup><br>(%) | Content |                |         |                   |                   |                   |                   |       |                   | Weight            |        |          |
|--------------------|---------------------------|---------|----------------|---------|-------------------|-------------------|-------------------|-------------------|-------|-------------------|-------------------|--------|----------|
|                    |                           | Crop    | Proventriculus | Gizzard | Duodenum          | Jejunum           | Ileum             | SI                | Caeca | Colon             | Liver             | Spleen | Pancreas |
| without            | 0                         | 1.54    | 0.11           | 1.18    | 0.12              | 1.31 <sup>a</sup> | 1.49 <sup>a</sup> | 2.91 <sup>a</sup> | 0.27  | 0.23              | 3.16 <sup>a</sup> | 0.12   | 0.27     |
|                    | 0.1                       | 1.44    | 0.06           | 1.33    | 0.09              | 0.86 <sup>b</sup> | 0.97 <sup>b</sup> | 1.91 <sup>b</sup> | 0.32  | 0.14              | 2.88 <sup>b</sup> | 0.12   | 0.27     |
| with               | 0                         | 1.46    | 0.34           | 1.56    | 0.08              | 1.03 <sup>b</sup> | 1.12 <sup>b</sup> | 2.21 <sup>b</sup> | 0.25  | 0.17              | 2.57 <sup>c</sup> | 0.12   | 0.26     |
|                    | 0.1                       | 1.11    | 0.07           | 1.24    | 0.07              | 0.95 <sup>b</sup> | 0.91 <sup>b</sup> | 1.92 <sup>b</sup> | 0.27  | 0.17              | 2.58 <sup>c</sup> | 0.12   | 0.26     |
| SEM <sup>2</sup>   |                           | 0.096   | 0.043          | 0.060   | 0.006             | 0.039             | 0.050             | 0.084             | 0.015 | 0.011             | 0.040             | 0.004  | 0.005    |
| Main effects       |                           |         |                |         |                   |                   |                   |                   |       |                   |                   |        |          |
| <u>Medication</u>  |                           |         |                |         |                   |                   |                   |                   |       |                   |                   |        |          |
|                    |                           | 1.49    | 0.09           | 1.26    | 0.10 <sup>a</sup> | 1.08              | 1.23              | 2.41              | 0.29  | 0.18              | 3.02              | 0.12   | 0.27     |
|                    |                           | 1.28    | 0.20           | 1.40    | 0.07 <sup>b</sup> | 0.99              | 1.02              | 2.07              | 0.26  | 0.17              | 2.57              | 0.12   | 0.26     |
| <u>BGase (%)</u>   |                           |         |                |         |                   |                   |                   |                   |       |                   |                   |        |          |
|                    | 0                         | 1.50    | 0.23           | 1.37    | 0.10 <sup>a</sup> | 1.17              | 1.31              | 2.56              | 0.26  | 0.20 <sup>a</sup> | 2.86              | 0.12   | 0.26     |
|                    | 0.1                       | 1.27    | 0.06           | 1.29    | 0.08 <sup>b</sup> | 0.90              | 0.94              | 1.91              | 0.29  | 0.15 <sup>b</sup> | 2.73              | 0.12   | 0.26     |
| <u>Probability</u> |                           |         |                |         |                   |                   |                   |                   |       |                   |                   |        |          |
|                    | Medication                | 0.28    | 0.16           | 0.22    | 0.006             | 0.15              | 0.009             | 0.01              | 0.21  | 0.61              | <.0001            | 0.54   | 0.13     |
|                    | BGase                     | 0.24    | 0.06           | 0.46    | 0.02              | 0.0002            | <.0001            | <.0001            | 0.20  | 0.03              | 0.01              | 0.93   | 0.81     |
|                    | Medication $\times$ BGase | 0.52    | 0.19           | 0.06    | 0.37              | 0.006             | 0.04              | 0.007             | 0.52  | 0.06              | 0.01              | 0.93   | 0.90     |

<sup>a-c</sup>Means within a main effect or interaction not sharing a common superscript are significantly different ( $P \leq 0.05$ ).

<sup>1</sup>BGase -  $\beta$ -glucanase; SI - small intestine

<sup>2</sup>SEM - pooled standard error of mean (n=18 birds per treatment).

## 485 **Performance parameters**

486 Interactions between medication and BGase were significant or nearly significant for  
487 BWG and FI from 0-7 d, 7-14 d ( $P = 0.06$ ) and 0-28 d ( $P = 0.06-0.07$ ), and F:G from 0-7 d in  
488 Experiment 1 (Table 19). Body weight gain and FI followed a similar response to treatments. In  
489 birds fed diets without medication, the addition of BGase tended to reduce gain or feed  
490 consumption, however in those fed diets with medication, enzyme either did not affect or  
491 increased these response criteria. For the 0-7 d F:G ratio interaction, enzyme decreased and  
492 increased feed efficiency in unmedicated diets and medicated diets, respectively.

493 In Experiment 2, interactions between main effects were significant for BWG for all  
494 periods (Table 20), but the nature of the response changed with age. From 0-11 d, medication  
495 increased gain, while enzyme did not affect gain in birds fed diets without medication and tended  
496 to increase gain in the medicated diet. Weight gain from 11 to 22 d was increased by enzyme  
497 regardless of diet medication. From 22-32 d, enzyme increased gain in the non-medicated diets  
498 but had no effect when diets contain medication. Overall, weight gain (0-32 d) was increased by  
499 enzyme use, regardless of diet medication but to a greater extent in the absence of medication.

500 Medication and enzyme use increased FI from 0-11 d, and medication similarly increased  
501 FI from 11-22 d. Interactions between medication and enzyme were significant from 22-32 d and  
502 approached significance ( $P = 0.06$ ) for the overall experiment. In both cases, the use of dietary  
503 BGase tended to decrease FI when medication was not fed and increase FI when it was.

504 Interactions were found between medication and BGase for F:G in all periods.  
505 Medication increased feed efficiency throughout the trial, but as was the case for BWG, the  
506 nature of the interaction with enzyme use changed with bird age. During the 0-11 d period, F:G  
507 increased with enzyme use when birds were fed non-medicated diets, but had no effect when the



508 medication was used. For the remainder of the periods, including the total trial, enzyme  
509 decreased F:G in birds fed non-medicated diets, but had no effect in broilers consuming  
510 medicated diets.

511           The total mortality of the trials was 3.8 and 3.9% in Experiment 1 and 2, respectively,  
512 and not affected by HB or BGase. In Experiment 2, the mortality attributed to coccidiosis (by  
513 necropsy) was identified as 4.3% of the total mortality. However, 46.7% of the total mortality  
514 was detected as systemic infection, including necrotic enteritis. Subclinical coccidiosis in the  
515 birds may damage the intestinal epithelial membrane and thereby enhance systemic infections  
516 due to bacterial translocation. It can be concluded that the vaccination with Coccivac-B52  
517 induced a disease challenge in the birds from Experiment 2 according to the detailed analysis of  
518 mortality data.

519

**Table 19. Effects of diet medication and  $\beta$ -glucanase on performance parameters of broiler chickens (Experiment 1)**

| Medication                              | $\beta$ -glucanase (%) | BWG <sup>1</sup> (kg) |       |       |        |        | FI (kg)             |       |       |        |        | F:G               |       |       |       |       |
|-----------------------------------------|------------------------|-----------------------|-------|-------|--------|--------|---------------------|-------|-------|--------|--------|-------------------|-------|-------|-------|-------|
|                                         |                        | d                     | d     | d     | d      | d      | d                   | d     | d     | d      | d      | d                 | d     | d     | d     |       |
|                                         |                        | 0-7                   | 7-14  | 14-21 | 21-28  | 0-28   | 0-7                 | 7-14  | 14-21 | 21-28  | 0-28   | 0-7               | 7-14  | 14-21 | 21-28 | 0-28  |
| without                                 | 0                      | 0.143 <sup>a</sup>    | 0.303 | 0.507 | 0.699  | 1.650  | 0.167 <sup>a</sup>  | 0.421 | 0.729 | 1.055  | 2.371  | 1.17 <sup>b</sup> | 1.39  | 1.44  | 1.53  | 1.45  |
|                                         | 0.1                    | 0.126 <sup>c</sup>    | 0.296 | 0.498 | 0.656  | 1.575  | 0.157 <sup>b</sup>  | 0.399 | 0.705 | 1.004  | 2.265  | 1.26 <sup>a</sup> | 1.35  | 1.42  | 1.54  | 1.44  |
| with                                    | 0                      | 0.130 <sup>bc</sup>   | 0.284 | 0.492 | 0.668  | 1.573  | 0.160 <sup>ab</sup> | 0.387 | 0.706 | 1.000  | 2.251  | 1.23 <sup>a</sup> | 1.36  | 1.44  | 1.50  | 1.43  |
|                                         | 0.1                    | 0.135 <sup>ab</sup>   | 0.301 | 0.494 | 0.677  | 1.607  | 0.160 <sup>ab</sup> | 0.409 | 0.695 | 1.012  | 2.275  | 1.19 <sup>b</sup> | 1.36  | 1.41  | 1.50  | 1.42  |
| SEM <sup>2</sup>                        |                        | 1.562                 | 2.966 | 4.564 | 10.050 | 14.222 | 1.172               | 4.887 | 5.856 | 11.406 | 18.375 | 0.008             | 0.011 | 0.009 | 0.014 | 0.007 |
| Main effects                            |                        |                       |       |       |        |        |                     |       |       |        |        |                   |       |       |       |       |
| <u>Medication</u>                       |                        |                       |       |       |        |        |                     |       |       |        |        |                   |       |       |       |       |
| Without                                 |                        | 0.134                 | 0.299 | 0.503 | 0.678  | 1.612  | 0.162               | 0.410 | 0.717 | 1.030  | 2.318  | 1.21              | 1.37  | 1.43  | 1.53  | 1.45  |
| With                                    |                        | 0.132                 | 0.292 | 0.493 | 0.673  | 1.591  | 0.160               | 0.398 | 0.700 | 1.006  | 2.263  | 1.21              | 1.36  | 1.42  | 1.50  | 1.43  |
| <u><math>\beta</math>-glucanase (%)</u> |                        |                       |       |       |        |        |                     |       |       |        |        |                   |       |       |       |       |
| 0                                       |                        | 0.136                 | 0.293 | 0.500 | 0.684  | 1.612  | 0.163               | 0.404 | 0.717 | 1.027  | 2.311  | 1.20              | 1.38  | 1.44  | 1.52  | 1.44  |
| 0.1                                     |                        | 0.130                 | 0.298 | 0.496 | 0.666  | 1.591  | 0.159               | 0.404 | 0.700 | 1.008  | 2.270  | 1.22              | 1.35  | 1.41  | 1.52  | 1.43  |
| <u>Probability</u>                      |                        |                       |       |       |        |        |                     |       |       |        |        |                   |       |       |       |       |
| Medication                              |                        | 0.36                  | 0.21  | 0.32  | 0.79   | 0.43   | 0.35                | 0.17  | 0.15  | 0.29   | 0.12   | 0.70              | 0.55  | 0.69  | 0.21  | 0.12  |
| $\beta$ -glucanase                      |                        | 0.01                  | 0.38  | 0.71  | 0.36   | 0.45   | 0.04                | 0.99  | 0.14  | 0.39   | 0.25   | 0.06              | 0.30  | 0.20  | 0.96  | 0.26  |
| Medication $\times$ $\beta$ -glucanase  |                        | <.0001                | 0.06  | 0.54  | 0.17   | 0.06   | 0.02                | 0.06  | 0.55  | 0.17   | 0.07   | <.0001            | 0.44  | 0.85  | 0.90  | 0.85  |

<sup>a-c</sup>Means within a main effect or interaction not sharing a common superscript are significantly different ( $P \leq 0.05$ ).

<sup>1</sup>BWG - body weight gain; FI - feed intake; F:G - feed to gain ratio.

<sup>2</sup>SEM - pooled standard error of mean (n=10 cages per treatment).

523 **Table 20. Effects of diet medication and  $\beta$ -glucanase on performance parameters of broiler chickens vaccinated for coccidiosis**  
 524 **(Experiment 2)**

| Medication         | BGase <sup>1</sup><br>(%) | BWG (kg)           |                    |                    |                    | FI (kg)            |                    |                     |                    | F:G                |                    |                    |                    |
|--------------------|---------------------------|--------------------|--------------------|--------------------|--------------------|--------------------|--------------------|---------------------|--------------------|--------------------|--------------------|--------------------|--------------------|
|                    |                           | d<br>0-11          | d<br>11-22         | d<br>22-32         | d<br>0-32          | d<br>0-11          | d<br>11-22         | d<br>22-32          | d<br>0-32          | d<br>0-11          | d<br>11-22         | d<br>22-32         | d<br>0-32          |
| without            | 0                         | 0.243 <sup>b</sup> | 0.562 <sup>d</sup> | 0.788 <sup>c</sup> | 1.594 <sup>d</sup> | 0.328              | 0.979              | 1.540 <sup>bc</sup> | 2.846              | 1.321 <sup>b</sup> | 1.617 <sup>a</sup> | 1.939 <sup>a</sup> | 1.721 <sup>a</sup> |
|                    | 0.1                       | 0.236 <sup>b</sup> | 0.622 <sup>c</sup> | 0.881 <sup>b</sup> | 1.740 <sup>c</sup> | 0.331              | 0.982              | 1.499 <sup>c</sup>  | 2.813              | 1.372 <sup>a</sup> | 1.471 <sup>b</sup> | 1.688 <sup>b</sup> | 1.561 <sup>b</sup> |
| with               | 0                         | 0.262 <sup>a</sup> | 0.675 <sup>b</sup> | 0.963 <sup>a</sup> | 1.900 <sup>b</sup> | 0.331              | 1.049              | 1.581 <sup>ab</sup> | 2.961              | 1.242 <sup>c</sup> | 1.429 <sup>b</sup> | 1.627 <sup>c</sup> | 1.497 <sup>c</sup> |
|                    | 0.1                       | 0.270 <sup>a</sup> | 0.702 <sup>a</sup> | 0.981 <sup>a</sup> | 1.954 <sup>a</sup> | 0.339              | 1.071              | 1.588 <sup>a</sup>  | 2.998              | 1.236 <sup>c</sup> | 1.423 <sup>b</sup> | 1.593 <sup>c</sup> | 1.479 <sup>c</sup> |
| SEM <sup>2</sup>   |                           | 0.002              | 0.640              | 0.904              | 0.025              | 0.002              | 0.008              | 0.009               | 0.017              | 0.011              | 0.015              | 0.024              | 0.017              |
| Main effects       |                           |                    |                    |                    |                    |                    |                    |                     |                    |                    |                    |                    |                    |
| <i>Medication</i>  |                           |                    |                    |                    |                    |                    |                    |                     |                    |                    |                    |                    |                    |
| without            |                           | 0.240              | 0.591              | 0.835              | 1.667              | 0.329 <sup>b</sup> | 0.981 <sup>b</sup> | 1.520               | 2.829 <sup>b</sup> | 1.347              | 1.544              | 1.813              | 1.641              |
| with               |                           | 0.266              | 0.689              | 0.972              | 1.927              | 0.335 <sup>a</sup> | 1.060 <sup>a</sup> | 1.584               | 2.905 <sup>a</sup> | 1.239              | 1.426              | 1.610              | 1.488              |
| <i>BGase (%)</i>   |                           |                    |                    |                    |                    |                    |                    |                     |                    |                    |                    |                    |                    |
| 0                  |                           | 0.252              | 0.618              | 0.876              | 1.747              | 0.329 <sup>b</sup> | 1.014              | 1.560               | 2.904              | 1.282              | 1.523              | 1.783              | 1.609              |
| 0.1                |                           | 0.253              | 0.662              | 0.931              | 1.847              | 0.335 <sup>a</sup> | 1.027              | 1.544               | 2.905              | 1.304              | 1.447              | 1.641              | 1.520              |
| <i>Probability</i> |                           |                    |                    |                    |                    |                    |                    |                     |                    |                    |                    |                    |                    |
| Medication         |                           | <.0001             | <.0001             | <.0001             | <.0001             | 0.01               | <.0001             | <.0001              | <.0001             | <.0001             | <.0001             | <.0001             | <.0001             |
| BGase              |                           | 0.77               | <.0001             | <.0001             | <.0001             | 0.01               | 0.18               | 0.14                | 0.92               | 0.01               | <.0001             | <.0001             | <.0001             |
| Medication × BGase |                           | 0.006              | 0.02               | 0.001              | 0.002              | 0.29               | 0.33               | 0.04                | 0.06               | 0.001              | <.0001             | <.0001             | <.0001             |

<sup>a-c</sup>Means within a main effect or interaction not sharing a common superscript are significantly different ( $P \leq 0.05$ ).

<sup>1</sup>BGase -  $\beta$ -glucanase; BWG - body weight gain; FI - feed intake; F:G - feed to gain ratio.

<sup>2</sup>SEM - pooled standard error of mean (n=9 pens per treatment).

## 526 **Discussion**

527           With minor exceptions, all three molecular weight parameters for soluble ileal digesta  $\beta$ -  
528 glucan were lower with the enzyme use, which confirms exogenous BGase mediates the  
529 depolymerization of HB  $\beta$ -glucan in broiler chickens. In addition, the reduction of MW-10%  
530 with BGase in both experiments further supports  $\beta$ -glucan depolymerization since it  
531 demonstrates the increased proportion of small molecular weight soluble  $\beta$ -glucan in ileal  
532 digesta. Overall, the response for Mp was similar in both experiments, which indicates that  $\beta$ -  
533 glucan depolymerization is independent of the disease status and the age of the animal. Further,  
534 Mw from Experiment 1 also supports the reduction of molecular weight in the ileal digesta  
535 soluble  $\beta$ -glucan with the use of BGase. In contrast, BGase increased Mw at both ages in  
536 Experiment 2 in the treatments with antibiotics. The reason for the increased  $\beta$ -glucan Mw is  
537 unknown but could relate to the aggregation of smaller weight  $\beta$ -glucan molecules [42-44] or  
538 enzyme mediated release of higher molecular weight, insoluble  $\beta$ -glucan that had not yet been  
539 depolymerized. The reduction of  $\beta$ -glucan molecular weight and the increased proportion of  
540 small molecular weight soluble  $\beta$ -glucan encourage the assessment of performance and digestive  
541 tract characteristics through increased  $\beta$ -glucan fermentation in broilers. Further, the proportion  
542 of small molecular weight  $\beta$ -glucan might be a critical assessment in chickens since chicken  
543 microbiota preferred small molecular sugars and peptides over complex polysaccharides and  
544 proteins in a study that investigated the utilization of nutrients by chicken caecal and human  
545 faecal microbes using an *in vitro* assay [45].

546           The molecular weight values were numerically lower at d 33 compared to d 11 in  
547 Experiment 2, which might be associated with an age-related adaptation of gut microbiota to  
548 utilize fibre [46]. Further, molecular weight parameters were lower in Experiment 1 compared to

549 both ages in Experiment 2. Although the experiments cannot be compared statistically, it does  
550 draw attention to experimental variation. The analyses of samples were completed at three  
551 different times. However, the probability that analytical error accounted for the variation is  
552 unlikely because the determination of  $\beta$ -glucan molecular weight distribution using size  
553 exclusion chromatography and Calcofluor post-column derivatization is a well-established  
554 technique in food science [38] and all laboratory work was completed in the same lab by the  
555 senior author. A more plausible explanation for the difference relates to variation in  $\beta$ -glucan  
556 characteristics in the barley samples that were fed. The birds were fed diets containing CDC  
557 Fibar in both experiments; however, the samples were different in the two experiments.  
558 Although they were the same cultivar, environmental conditions such as germination may have  
559 impacted  $\beta$ -glucan molecular weight. High moisture content in the environment might activate  
560 endogenous enzymes in barley and degrade non-starch polysaccharides, including  $\beta$ -glucan,  
561 which is supported by the improved nutritive value of barley with water treatment [47].  
562 Moreover, the molecular weight differences in the two experiments could be attributed to the  
563 resident gut microbiota being markedly different between the studies that could harbor different  
564  $\beta$ -glucanase capabilities. The variable gut microbiota composition among the broiler chickens  
565 derived from the same breeder flock and raised under the same conditions, including diets,  
566 support the difference related to the microbial enzyme activity [48]. To the best of our  
567 knowledge, this, and other research in the same lab, are the first to document molecular weight  
568 changes in soluble  $\beta$ -glucan because of exogenous BGase use in chickens fed barley diets. The  
569 BGase effect on the reduction of ileal soluble  $\beta$ -glucan molecular weight in this study is in  
570 agreement with previous results from our lab [49].

571           The molecular weight parameters in the two experiments decreased with medication  
572 when there was no added BGase in the diet, which is an unexpected finding since the medication  
573 does not contain endo- $\beta$ -glucanase activity. It is possibly due to the effect of the antibiotics on  
574 modification of the gastro-intestinal microbial population [50-52] resulting in microbiota with an  
575 increased capacity to degrade high molecular weight  $\beta$ -glucan into low molecular weight  
576 polysaccharides and oligosaccharides. *In vitro* studies have demonstrated that strict anaerobic  
577 caecal microbiota, including *Bacteroides ovatus*, *B. uniformis*, *B. capillosus*, *Enterococcus*  
578 *faecium*, *Clostridium perfringens* and *Streptococcus* strains in broiler chickens are capable of  
579 degrading mixed-linked  $\beta$ -glucan [53]. The changes in the intestinal microbial populations were  
580 also reported in pigs fed barley-based diets [54,55], although they were not the same bacterial  
581 species as in the above-mentioned *in vitro* assays. However, medication was not able to  
582 breakdown high molecular weight  $\beta$ -glucan to the same extent as BGase. It demonstrates the  
583 higher efficacy of feed BGase in comparison to the BGase originated from microbiota in the  
584 chicken gastro-intestinal tract of degrading high molecular weight  $\beta$ -glucan.

585           Exogenous BGase depolymerizes high molecular weight soluble  $\beta$ -glucan into low  
586 molecular weight  $\beta$ -glucan in the ileal digesta, which leads to a reduction of ileal viscosity in  
587 broiler chickens, and this is evident in both experiments. However, the medication did not affect  
588 ileal viscosity in broiler chickens, although the molecular weight was reduced with the addition  
589 of antibiotics to the broiler diets. Nevertheless, viscosity changes at 11 d are similar to the  
590 molecular weight data where enzyme decreased values, but the decrease was smaller with  
591 medicated diets, and it is primarily due to the low viscosity in the treatments with medication  
592 when BGase was not used. In addition to the degree of polymerization of  $\beta$ -glucan, there might  
593 be other factors that affect intestinal viscosity, including the concentration, solubility, structure,

594 and configuration of non-starch polysaccharides including  $\beta$ -glucan and arabinoxylan in the  
595 digesta [56-58]. Further, medication might have shifted the ileal microbial population in a way  
596 that leads to increased intestinal mucus production, which can contribute to ileal viscosity  
597 [59,60]. In addition, high amounts of NSP in the diet also increase intestinal mucus production in  
598 monogastric animals [59,61].

599 Overall, BGase reduced the empty weights, lengths, and content weights in the digestive  
600 tract segments in both experiments, which agrees with previous broiler research that used the  
601 same diets but without medication [62]. The reduction in size coincides with increased digestive  
602 efficiency associated with enzyme use and has been reported previously [63,64]. In addition, the  
603 reduction of gastro-intestinal content weights might be associated with increased feed passage  
604 rate in the gastro-intestinal tract [65,66] since exogenous BGase decreases digesta viscosity and  
605 thereby increases digestive function in the broiler chickens [67,68]. Further, HB mediated larger  
606 digestive tract might hold more digesta that leads to increased gastro-intestinal content weights  
607 in the current study. Medication decreased the empty weights and lengths from the duodenum to  
608 colon and the content weights of the digestive tract segments. The reduction of digestive tract  
609 size and content follows previous research that observed the decreased intestinal tract weights  
610 and lengths with in-feed antibiotics (Bacitracin methylene disalicylate and virginiamycin) in  
611 broiler chickens [69]. The use of specific antibiotics in feed reduces the growth of pathogenic  
612 bacteria in the digestive tract of chickens through the modification of microbial diversity and  
613 relative abundance, and immune status [29,30], and thereby increases nutrient digestibility. The  
614 reduction of relative abundance of gut microbiota reduces the competition with the host and thus  
615 enables the host to extract all the required nutrients, and thereby the digestive tract size might be  
616 reduced [70,71]. Further, diet medication might increase nutrient digestion due to increased

617 utilization of non-starch polysaccharides by the gut microbiota by selecting for a more effective  
618 fibre degrading microbiome, which is supported by  $\beta$ -glucan molecular weight reduction with  
619 antibiotics addition to the diets in the current research. The effects of medication on relative  
620 digestive tract size and content weights were mostly significant when the HB based diets did not  
621 contain BGase since the enzyme also decreases digestive tract size by increasing nutrient  
622 digestibility in broiler chickens.

623         Levels of SCFA and pH in the digestive tract were used to estimate the effects of diet  
624 BGase and antibiotics on carbohydrate fermentation. Diet BGase and medication depolymerized  
625 soluble  $\beta$ -glucan in HB in the ileal digesta of broiler chickens, which may influence carbohydrate  
626 fermentation in the lower digestive tract. Ileal pH was higher with BGase use at both ages of  
627 broiler chickens in Experiment 2. A BGase mediated increase in ileal pH is contradictory to the  
628 current hypothesis of an enzyme-dependent enhancement of carbohydrate fermentation that  
629 might be expected based on a large quantity of low molecular weight  $\beta$ -glucan resulting from  
630 high molecular weight  $\beta$ -glucan depolymerization due to enzyme use. The increased ileal pH  
631 might relate to the increased feed passage rate from the ileum to caeca with the reduction of  
632 soluble  $\beta$ -glucan molecular weight, which permits less time for the bacterial fermentation in the  
633 ileum [49]. However, ileal pH is contradictory to total, and individual SCFA concentrations in  
634 the ileum since BGase increased SCFA levels at d 33 in the current study. A reduction of caecal  
635 pH with enzyme (d 11 without medication; d 33) might indicate increased carbohydrate  
636 fermentation in the caeca, which is in agreement with previous research [25]. Further, BGase  
637 increased SCFA concentrations in the caeca (d 11 without medication) in the current study,  
638 which corresponds with the caecal pH at d 11. Overall, the results suggest BGase has shifted  
639 bacterial fermentation from the ileum to caeca in broiler chickens.



640           The antibiotic-induced modification of the gastro-intestinal microbial population might  
641 affect the production of SCFA, which in turn influences the enzyme response on carbohydrate  
642 fermentation in broiler chickens. Medication affected intestinal pH in a similar fashion to BGase,  
643 and similar to the findings of [28], who found increased ileal pH and lowered caecal pH with the  
644 addition of salinomycin and Zn bacitracin to broiler diets. However, diet medication did not  
645 affect the concentrations of SCFA in the ileum, whereas it decreased total and most of the  
646 individual SCFA concentrations in the caeca in the current study, which is again contradictory to  
647 the caecal pH. The reduction of caecal pH might be due to the effect of antibiotics on reducing  
648 protein putrefaction to a greater extent than it did SCFA production in the caeca. However, the  
649 concentrations of alkalizing metabolites, including the biogenic amines, are not available in the  
650 current study. Nevertheless, the reduction of caecal SCFA concentration was in accordance to  
651 the study completed by [72] that used salinomycin in broiler feed. Antibiotics modulate the  
652 microbial population of the chicken digestive tract [73,74], and these microbes might not  
653 effectively utilize the fermentable fibre, including  $\beta$ -glucan in the chicken digestive tract due to  
654 the lower production of microbial-derived non-starch polysaccharidases. However, it is  
655 contradictory to the findings of the ileal  $\beta$ -glucan molecular weight distribution, since medication  
656 reduced the molecular weight, which demonstrates the presence of gastro-intestinal bacteria that  
657 could secrete non-starch polysaccharidases. The resulting SCFA might have been immediately  
658 utilized by gut microbes to produce other metabolic products and affects the measured levels of  
659 SCFA. Of note, the crop pH was higher with diet medication. The crop is colonized by BGase-  
660 secreting microbiota [75], and medication modifies the crop microbiota, thereby affects  
661 carbohydrate fermentation [76].

662 A few treatment main effects were found for ileal histo-morphology, but no interactions  
663 were significant. Medication increased villus height to crypt depth ratio in the ileum, which is an  
664 indication of increased nutrient absorption surface [77] that eventually leads to the enhancement  
665 of nutrient digestion and performance of chickens. The effect of diet medication on reducing  
666 digestive tract size and content also supports the increased nutrient digestibility, which is  
667 indicated by the higher villus height to crypt depth ratio. In addition, medication decreased crypt  
668 depth in the ileum. Increased crypt depth indicates high cell proliferation in the intestinal  
669 epithelial cells [78], which is an indication of inflammation in the intestinal mucosa. Thus the  
670 mucosa enhances healing from the inflammatory damage by increasing cell proliferation [79,80].  
671 Inflammation is a protective mechanism, although uncontrolled and chronic inflammation may  
672 damage the affected tissues [81,82]. Therefore, the reduction of crypt depth is considered as a  
673 positive entity that enhances bird health. The use of specific diet medication shifts bacterial  
674 distribution in the digestive tract of broiler chickens towards saccharolytic fermentation [31] and  
675 increases SCFA production, including butyrate, that could increase digestive tract epithelial  
676 growth [83], and it might be the cause for the high villus height: crypt depth in the ileum. Short  
677 chain fatty acids, especially butyrate, have the potential to affect inflammation by regulating  
678 inflammatory cytokines [84,85]. However, the medication did not affect total SCFA or butyrate  
679 in the ileum in the current research.

680 Treatment affected SCFA concentrations, and intestinal pH in coccidiosis challenged  
681 broiler chickens, but not in battery-cage raised and unchallenged birds. Further, the treatment  
682 effects were larger for broilers at 11 d (mostly infected with *Eimeria* spp) compared to the same  
683 birds at 33 d (mostly recovered from the disease) in the coccidiosis challenge study. *Eimeria* spp  
684 disturbs the lower gastro-intestinal microbial population in broilers [86,87] due to the epithelial

685 damage of the intestinal mucosa, and this, in turn, affects SCFA production [88]. On the other  
686 hand, a precise estimate of SCFA production might not be measured in the current study due to  
687 the limitations of the digesta collection procedure. Partial absorption of SCFA to the portal  
688 circulation before sample collection, which leads to under-estimation of the values, and ileal and  
689 caecal evacuation that is affected by the time of the sample collection, results in individual bird  
690 variability in results. In addition, protein fermentation affects digesta pH since some of the  
691 protein fermentation products, including ammonia, indoles, phenols and biogenic amines,  
692 increase pH in the digestive tract of chickens [89].

693 Performance variables were within the normal range, according to Ross 308 Broiler  
694 Performance Objectives [34]. The interaction between BGase and medication was significant for  
695 BWG and F:G at all the periods of the broiler production cycle in Experiment 2. Over the entire  
696 experiment, medication increased both BWG and feed efficiency of broilers. However, the  
697 medication response was higher without the use of BGase since exogenous BGase positively  
698 influence growth performance in the current study. Both Zn Bacitracin and ionophore  
699 anticoccidials have been classified as growth-promoting drugs in broiler chickens due to their  
700 positive impact on body weight gain and feed efficiency [28,90,91]. Antibiotics in the diets shift  
701 the gastro-intestinal microbial population towards a diversified and potentially beneficial  
702 microbiota [29,92]. Among the beneficial changes is an increase in carbohydrate fermentation  
703 [93], including  $\beta$ -glucan, and positively affect gastro-intestinal physiology and health and helps  
704 in improving the production performance of broiler chickens. Short chain fatty acids, especially  
705 butyric acid, produced as a result of carbohydrate fermentation, increase energy supply to  
706 intestinal epithelial cells [94], increases nutrient absorptive surface area by increasing villi size  
707 [95,96], and also decreases harmful pathogenic bacteria in the lower digestive tract of chickens

708 [93]. Villi height to crypt depth ratio in the ileum increased with medication in the current study,  
709 which supports antibiotics mediated enhancement of the ileal absorptive surface area in broiler  
710 chickens. However, total and individual SCFA concentrations in the caeca decreased with the  
711 addition of antibiotics, which is contradictory to carbohydrate fermentation induced  
712 improvement of physiological and growth parameters in the current research.

713       Beta-glucanase increased the BWG and feed efficiency of broiler chickens after d 11,  
714 although these parameters were lower with the use of BGase before d 11. These results agree  
715 with previous research that used same diets without medication, which observed the poor  
716 production performance in young birds (< 11 d) [97]. The poor performance of younger birds  
717 may be attributed to an undesirable effect of the increased quantity of low molecular weight  
718 carbohydrates on the gut microbiota due to the coccidiosis challenge-induced diseased state and  
719 the immature status of the digestive system and gut microbiota. In the study of [97], BGase  
720 dosage of 0.01% increased broiler performance for the same age period (0 to 11 days) when  
721 compared to 0% BGase. However, 0.1% BGase did not affect the BWG and reduced the feed  
722 efficiency in the birds aged < 11 d but increased these parameters after d 11. Moreover, BGase  
723 decreased the total requirement of medication in HB-based diets in terms of achieving a high  
724 production performance, as the medication response on performance variables decreased with the  
725 addition of BGase to the diets. It demonstrates the ability of BGase to partially replace diet  
726 medication in HB-based diets to feed broiler chickens. In contrast to the results of Experiment 2,  
727 the effects of medication and BGase on performance variables were not significant in the  
728 production cycle except the period of d 0-7 of broiler chickens in Experiment 1, where birds  
729 were grown in battery cages without disease challenge. The environment of battery cages is  
730 relatively hygienic compared to litter floor pens and is generally considered to present less

731 pathogenic bacterial exposure with the birds. It might be the reason for less significant effects of  
732 medication and enzyme on production parameters in the battery cage study.

733 In conclusion, feed BGase and medication can depolymerize high molecular weight  
734 soluble  $\beta$ -glucan of HB into low molecular weight  $\beta$ -glucan in the digestive tract of broilers in  
735 both experiments; however, the response was higher with BGase compared to medication. The  
736 effects of diet medication and BGase on carbohydrate fermentation were not consistent across  
737 sample collections in the two experiments according to SCFA levels and intestinal pH, although  
738 treatment effects were observed in certain instances. Exogenous BGase and medication increased  
739 the growth performance of broiler chickens. Moreover, BGase reduced the necessity of  
740 antibiotics and anticoccidials in HB-based diets to achieve a high level of production  
741 performance of broiler chickens challenged for coccidiosis.

## 742 **Acknowledgments**

743 The authors would like to acknowledge the Poultry Centre staff at the University of  
744 Saskatchewan, and Dawn Abbott and Tracy Exley for their technical support.

## 745 **References**

- 746 1. Castanon JIR. History of the use of antibiotic as growth promoters in European poultry  
747 feeds. *Poult Sci.* 2007;86: 2466–2471. doi:10.3382/ps.2007-00249
- 748 2. Gadde U, Kim WH, Oh ST, Lillehoj HS. Alternatives to antibiotics for maximizing growth  
749 performance and feed efficiency in poultry: a review. *Anim Health Res Rev.* 2017;18: 26–  
750 45. doi:10.1017/S1466252316000207
- 751 3. Nhung NT, Chansiripornchai N, Carrique-Mas JJ. Antimicrobial resistance in bacterial  
752 poultry pathogens: a review. *Front Vet Sci.* 2017;4. doi:10.3389/fvets.2017.00126
- 753 4. Lillehoj H, Liu Y, Calsamiglia S, Fernandez-Miyakawa ME, Chi F, Cravens RL, et al.  
754 Phytochemicals as antibiotic alternatives to promote growth and enhance host health. *Vet*  
755 *Res.* 2018;49: 76. doi:10.1186/s13567-018-0562-6

- 756 5. Suresh G, Das RK, Brar SK, Rouissi T, Ramirez AA, Chorfi Y, et al. Alternatives to  
757 antibiotics in poultry feed: molecular perspectives. *Crit Rev Microbiol.* 2018;44: 318–335.  
758 doi:10.1080/1040841X.2017.1373062
- 759 6. Allen HK, Levine UY, Looft T, Bandrick M, Casey TA. Treatment, promotion,  
760 commotion: antibiotic alternatives in food-producing animals. *Trends Microbiol.* 2013;21:  
761 114–119. doi:10.1016/j.tim.2012.11.001
- 762 7. Seal BS, Lillehoj HS, Donovan DM, Gay CG. Alternatives to antibiotics: a symposium on  
763 the challenges and solutions for animal production. *Anim Health Res Rev.* 2013;14: 78–87.  
764 doi:10.1017/S1466252313000030
- 765 8. Gaggia F, Mattarelli P, Biavati B. Probiotics and prebiotics in animal feeding for safe food  
766 production. *Int J Food Microbiol.* 2010;141 Suppl 1: S15-28.  
767 doi:10.1016/j.ijfoodmicro.2010.02.031
- 768 9. Baurhoo B, Phillip L, Ruiz-Feria CA. Effects of purified lignin and mannan  
769 oligosaccharides on intestinal integrity and microbial populations in the ceca and litter of  
770 broiler chickens. *Poult Sci.* 2007;86: 1070–1078. doi:10.1093/ps/86.6.1070
- 771 10. Baurhoo B, Ferket PR, Zhao X. Effects of diets containing different concentrations of  
772 mannanoligosaccharide or antibiotics on growth performance, intestinal development, cecal  
773 and litter microbial populations, and carcass parameters of broilers. *Poult Sci.* 2009;88:  
774 2262–2272. doi:10.3382/ps.2008-00562
- 775 11. Xu ZR, Hu CH, Xia MS, Zhan XA, Wang MQ. Effects of dietary fructooligosaccharide on  
776 digestive enzyme activities, intestinal microflora and morphology of male broilers. *Poult*  
777 *Sci.* 2003;82: 1030–1036. doi:10.1093/ps/82.6.1030
- 778 12. Shang Y, Regassa A, Kim JH, Kim WK. The effect of dietary fructooligosaccharide  
779 supplementation on growth performance, intestinal morphology, and immune responses in  
780 broiler chickens challenged with *Salmonella* Enteritidis lipopolysaccharides. *Poult Sci.*  
781 2015;94: 2887–2897. doi:10.3382/ps/pev275
- 782 13. Flickinger EA, Van Loo J, Fahey GC. Nutritional responses to the presence of inulin and  
783 oligofructose in the diets of domesticated animals: a review. *Crit Rev Food Sci Nutr.*  
784 2003;43: 19–60. doi:10.1080/10408690390826446
- 785 14. Bogusławska-Tryk M, Piotrowska A, Burlikowska K. Dietary fructans and their potential  
786 beneficial influence on health and performance parameters in broiler chickens. *J Cent Eur*  
787 *Agric.* 2012;13: 272–291. doi:https://doi.org/10.5513/JCEA01/13.2.1045
- 788 15. Kim G-B, Seo YM, Kim CH, Paik IK. Effect of dietary prebiotic supplementation on the  
789 performance, intestinal microflora, and immune response of broilers. *Poult Sci.* 2011;90:  
790 75–82. doi:10.3382/ps.2010-00732

- 791 16. Khodambashi Emami N, Samie A, Rahmani HR, Ruiz-Feria CA. The effect of peppermint  
792 essential oil and fructooligosaccharides, as alternatives to virginiamycin, on growth  
793 performance, digestibility, gut morphology and immune response of male broilers. *Anim*  
794 *Feed Sci Technol.* 2012;175: 57–64. doi:10.1016/j.anifeedsci.2012.04.001
- 795 17. Courtin CM, Swennen K, Broekaert WF, Swennen Q, Buyse J, Decuyper E, et al. Effects  
796 of dietary inclusion of xylooligosaccharides, arabinoxylooligosaccharides and soluble  
797 arabinoxylan on the microbial composition of caecal contents of chickens. *J Sci Food*  
798 *Agric.* 2008;88: 2517–2522. doi:10.1002/jsfa.3373
- 799 18. De Maesschalck C, Eeckhaut V, Maertens L, De Lange L, Marchal L, Nezer C, et al.  
800 Effects of xylo-oligosaccharides on broiler chicken performance and microbiota. *Appl*  
801 *Environ Microbiol.* 2015;81: 5880–5888. doi:10.1128/AEM.01616-15
- 802 19. Eeckhaut V, Van Immerseel F, Dewulf J, Pasmans F, Haesebrouck F, Ducatelle R, et al.  
803 Arabinoxylooligosaccharides from wheat bran inhibit *Salmonella* colonization in broiler  
804 chickens. *Poult Sci.* 2008;87: 2329–2334. doi:10.3382/ps.2008-00193
- 805 20. Owens B, Tucker L, Collins MA, McCracken KJ. Effects of different feed additives alone  
806 or in combination on broiler performance, gut microflora and ileal histology. *Br Poult Sci.*  
807 2008;49: 202–212. doi:10.1080/00071660802004890
- 808 21. Rodríguez ML, Rebolé A, Velasco S, Ortiz LT, Treviño J, Alzueta C. Wheat- and barley-  
809 based diets with or without additives influence broiler chicken performance, nutrient  
810 digestibility and intestinal microflora. *J Sci Food Agric.* 2012;92: 184–190.  
811 doi:10.1002/jsfa.4561
- 812 22. Classen HL, Campbell GL, Rossnagel BG, Bhatta R, Reichert RD. Studies on the use of  
813 hullless barley in chick diets: deleterious effects and methods of alleviation. *Can J Anim Sci.*  
814 1985;65: 725–733. doi:10.4141/cjas85-085
- 815 23. McNab JM, Smithard RR. Barley  $\beta$ -Glucan: An antinutritional factor in poultry feeding.  
816 *Nutr Res Rev.* 1992;5: 45–60. doi:10.1079/NRR19920006
- 817 24. Ames N, Rhymer C, Rossnagel B, Therrien M, Ryland D, Dua S, et al. Utilization of  
818 diverse hullless barley properties to maximize food product quality. *Cereal Food World.*  
819 2006; 51: 23-28. doi:10.1094/CFW-51-0023
- 820 25. Józefiak D, Kaczmarek S, Rutkowski A, Józefiak A, Jensen BB, Engberg RM.  
821 Fermentation in broiler chicken gastrointestinal tract as affected by high dietary inclusion of  
822 barley and by  $\beta$ -glucanase supplementation. *J Anim Feed Sci.* 2005;14: 695–704.  
823 doi:10.22358/jafs/67156/2005
- 824 26. Józefiak D, Rutkowski A, Kaczmarek S, Jensen BB, Engberg RM, Højberg O. Effect of  $\beta$ -  
825 glucanase and xylanase supplementation of barley- and rye-based diets on caecal  
826 microbiota of broiler chickens. *Br Poult Sci.* 2010;51: 546–557.  
827 doi:10.1080/00071668.2010.507243

- 828 27. Jiang Y, Zhang W, Gao F, Zhou G. Effect of sodium butyrate on intestinal inflammatory  
829 response to lipopolysaccharide in broiler chickens. *Can J Anim Sci.* 2015;95: 389–395.  
830 doi:10.4141/cjas-2014-183
- 831 28. Engberg RM, Hedemann MS, Leser TD, Jensen BB. Effect of zinc bacitracin and  
832 salinomycin on intestinal microflora and performance of broilers. *Poult Sci.* 2000;79: 1311–  
833 1319. doi:10.1093/ps/79.9.1311
- 834 29. Dibner JJ, Richards JD. Antibiotic growth promoters in agriculture: history and mode of  
835 action. *Poult Sci.* 2005;84: 634–643. doi:10.1093/ps/84.4.634
- 836 30. Lee KW, Ho Hong Y, Lee SH, Jang SI, Park MS, Bautista DA, et al. Effects of  
837 anticoccidial and antibiotic growth promoter programs on broiler performance and immune  
838 status. *Res Vet Sci.* 2012;93: 721–728. doi:10.1016/j.rvsc.2012.01.001
- 839 31. Singh P, Karimi A, Devendra K, Waldroup PW, Cho KK, Kwon YM. Influence of  
840 penicillin on microbial diversity of the cecal microbiota in broiler chickens. *Poult Sci.*  
841 2013;92: 272–276. doi:10.3382/ps.2012-02603
- 842 32. Olfert ED, Cross BM, McWilliam AA. Guide to the Care and Use of Experimental  
843 Animals. Vol. 1. 2nd ed. Canadian Council on Animal Care. Ottawa, ON, Canada; 1993.
- 844 33. CCAC Guidelines on: The Care and Use of Farm Animals in Research, Teaching and  
845 Testing. Canadian Council on Animal Care. Ottawa, ON, Canada.; 2009.
- 846 34. Ross 308 Broiler Performance Objectives. 2014. Available:  
847 [http://en.aviagen.com/assets/Tech\\_Center/Ross\\_Broiler/Ross-308-Broiler-PO-2014-](http://en.aviagen.com/assets/Tech_Center/Ross_Broiler/Ross-308-Broiler-PO-2014-EN.pdf)  
848 [EN.pdf](http://en.aviagen.com/assets/Tech_Center/Ross_Broiler/Ross-308-Broiler-PO-2014-EN.pdf)
- 849 35. Official methods of analysis, 18th. ed. Association of Official Analytical Chemists.  
850 Arlington, VA.; 2006.
- 851 36. Approved Methods of Analysis. 11th ed. American Association of Cereal Chemists, St.  
852 Paul, MN.; 2010.
- 853 37. ICC Standard Methods. International Association for Cereal Science and Technology,  
854 Vienna, Austria; 2011.
- 855 38. Boyd L, Holley R, Storsley J, Ames N. Effect of heat treatments on microbial load and  
856 associated changes to  $\beta$ -glucan physicochemical properties in whole grain barley. *Cereal*  
857 *Chem.* 2017;94: 333–340. doi:10.1094/CCHEM-04-16-0099-R
- 858 39. Zhao G, Nyman M, Jönsson JÅ. Rapid determination of short-chain fatty acids in colonic  
859 contents and faeces of humans and rats by acidified water-extraction and direct-injection  
860 gas chromatography. *Biomed Chromatogr.* 2006;20: 674–682. doi:10.1002/bmc.580



- 861 40. Osho SO, Wang T, Horn NL, Adeola O. Comparison of goblet cell staining methods in  
862 jejunal mucosa of turkey poults. *Poult Sci.* 2017;96: 556–559. doi:10.3382/ps/pew324
- 863 41. SAS User's Guide: Statistics. Version 9.4 ed. SAS Institute. Inc., Cary, NC; 2008.
- 864 42. Holtekjølen AK, While SG, Sahlstrøm S, Knutsen SH, Uhlen AK, Åssveen M, et al.  
865 Changes in relative molecular weight distribution of soluble barley beta-glucan during  
866 passage through the small intestine of pigs. *Livest Sci.* 2014;168: 102–108.  
867 doi:10.1016/j.livsci.2014.06.027
- 868 43. Gaborieau M, Castignolles P. Size-exclusion chromatography (SEC) of branched polymers  
869 and polysaccharides. *Anal Bioanal Chem.* 2011;399: 1413–1423. doi:10.1007/s00216-010-  
870 4221-7
- 871 44. Zhao Y, Zhou H-M, Huang Z-H, Zhao R-Y. Different aggregation states of barley  $\beta$ -glucan  
872 molecules affects their solution behavior: A comparative analysis. *Food Hydrocoll.*  
873 2020;101: 105543. doi:10.1016/j.foodhyd.2019.105543
- 874 45. Lei F, Yin Y, Wang Y, Deng B, Yu HD, Li L, et al. Higher-level production of volatile  
875 fatty acids in vitro by chicken gut microbiotas than by human gut microbiotas as  
876 determined by functional analyses. *Appl Environ Microbiol.* 2012;78: 5763–5772.  
877 doi:10.1128/AEM.00327-12
- 878 46. Bautil A, Verspreet J, Buyse J, Goos P, Bedford MR, Courtin CM. Age-related  
879 arabinoxylan hydrolysis and fermentation in the gastrointestinal tract of broilers fed wheat-  
880 based diets. *Poult Sci.* 2019;98: 4606–4621. doi:10.3382/ps/pez159
- 881 47. Fry RE, Allred JB, Jensen LS, McGinnis J. Influence of enzyme supplementation and water  
882 treatment on the nutritional value of different grains for poults. *Poult Sci.* 1958;37: 372–  
883 375. doi:10.3382/ps.0370372
- 884 48. Stanley D, Geier MS, Denman SE, Haring VR, Crowley TM, Hughes RJ, et al.  
885 Identification of chicken intestinal microbiota correlated with the efficiency of energy  
886 extraction from feed. *Vet Microbiol.* 2013;164: 85–92. doi:10.1016/j.vetmic.2013.01.030
- 887 49. Karunaratne ND, Ames NP, Van Kessel AG, Bedford MR, Newkirk RW, Classen HL.  
888 Effects of graded levels of hullless barley and beta-glucanase on beta-glucan  
889 depolymerization, digestive tract morphology and physiology of broiler chickens  
890 vaccinated for coccidiosis. *Poult Sci.* 2019;98(E-suppl. 1): 38.
- 891 50. Torok VA, Allison GE, Percy NJ, Ophel-Keller K, Hughes RJ. Influence of antimicrobial  
892 feed additives on broiler commensal posthatch gut microbiota development and  
893 performance. *Appl Environ Microbiol.* 2011;77: 3380–3390. doi:10.1128/AEM.02300-10
- 894 51. Simon K, Verwoolde MB, Zhang J, Smidt H, de Vries Reilingh G, Kemp B, et al. Long-  
895 term effects of early life microbiota disturbance on adaptive immunity in laying hens. *Poult*  
896 *Sci.* 2016;95: 1543–1554. doi:10.3382/ps/pew088

- 897 52. Xiong W, Wang Y, Sun Y, Ma L, Zeng Q, Jiang X, et al. Antibiotic-mediated changes in  
898 the fecal microbiome of broiler chickens define the incidence of antibiotic resistance genes.  
899 Microbiome. 2018;6. doi:10.1186/s40168-018-0419-2
- 900 53. Beckmann L, Simon O, Vahjen W. Isolation and identification of mixed linked beta-glucan  
901 degrading bacteria in the intestine of broiler chickens and partial characterization of  
902 respective 1,3-1,4-beta-glucanase activities. J Basic Microbiol. 2006;46: 175–185.  
903 doi:10.1002/jobm.200510107
- 904 54. Pieper R, Bindelle J, Malik G, Marshall J, Rosnagel BG, Leterme P, et al. Influence of  
905 different carbohydrate composition in barley varieties on *Salmonella* Typhimurium var.  
906 Copenhagen colonisation in a “Trojan” challenge model in pigs. Arch Anim Nutr. 2012;66:  
907 163–179. doi:10.1080/1745039X.2012.676814
- 908 55. Gorham JB, Kang S, Williams BA, Grant LJ, McSweeney CS, Gidley MJ, et al. Addition of  
909 arabinoxylan and mixed linkage glucans in porcine diets affects the large intestinal bacterial  
910 populations. Eur J Nutr. 2017;56: 2193–2206. doi:10.1007/s00394-016-1263-4
- 911 56. Boros D, Marquardt RR, Slominski BA, Guenter W. Extract viscosity as an indirect assay  
912 for water-soluble pentosan content in rye. Cereal Chem. 1993 [cited 13 May 2020].  
913 Available: <https://agris.fao.org/agris-search/search.do?recordID=US9433814>
- 914 57. Saulnier L, Peneau N, Thibault J-F. Variability in grain extract viscosity and water-soluble  
915 arabinoxylan content in wheat. J Cereal Sci. 1995;22: 259–264. doi:10.1006/jcers.1995.0062
- 916 58. Knudsen KEB. The impact of arabinoxylan and  $\beta$ -glucan in the nutrition of pigs and  
917 poultry. Proc 37th West Nutr Conf. 2016; 130–142.
- 918 59. Morel PCH, Melai J, Eady SL, Coles GD. Effect of non-starch polysaccharides and  
919 resistant starch on mucin secretion and endogenous amino acid losses in pigs. Asian  
920 Australas J Anim Sci. 2005;18: 1634–1641. doi:2005.18.11.1634
- 921 60. Cadogan DJ, Choct M. Pattern of non-starch polysaccharide digestion along the gut of the  
922 pig: Contribution to available energy. Anim Nutr. 2015;1: 160–165.  
923 doi:10.1016/j.aninu.2015.08.011
- 924 61. Mälkki Y, Virtanen E. Gastrointestinal effects of oat bran and oat gum: a review. LWT-  
925 Food Sci Technol. 2001;34: 337–347. doi:10.1006/fstl.2001.0795
- 926 62. Karunaratne ND, Bedford MR, Newkirk RW, Classen HL. Graded levels of hullless barley  
927 and  $\beta$ -glucanase affect the digestive tract morphology of broiler chickens vaccinated for  
928 coccidiosis. Poult Sci. 2017a;96 (E-suppl. 1): 109.
- 929 63. Brenes A, Smith M, Guenter W, Marquardt RR. Effect of enzyme supplementation on the  
930 performance and digestive tract size of broiler chickens fed wheat- and barley-based diets.  
931 Poult Sci. 1993;72: 1731–1739. doi:10.3382/ps.0721731

- 932 64. Jørgensen H, Zhao XQ, Knudsen KE, Eggum BO. The influence of dietary fibre source and  
933 level on the development of the gastrointestinal tract, digestibility and energy metabolism  
934 in broiler chickens. *Br J Nutr.* 1996;75: 379–395. doi:10.1079/bjn19960141
- 935 65. Salih ME, Classen HL, Campbell GL. Response of chickens fed on hull-less barley to  
936 dietary  $\beta$ -glucanase at different ages. *Anim Feed Sci Technol.* 1991;33: 139–149.  
937 doi:10.1016/0377-8401(91)90052-T
- 938 66. Almirall M, Esteve-Garcia E. Rate of passage of barley diets with chromium oxide:  
939 influence of age and poultry strain and effect of beta-glucanase supplementation. *Poult Sci.*  
940 1994;73: 1433–1440. doi:10.3382/ps.0731433
- 941 67. Hesselman K, Åman P. The effect of  $\beta$ -glucanase on the utilization of starch and nitrogen  
942 by broiler chickens fed on barley of low- or high-viscosity. *Anim Feed Sci Technol.*  
943 1986;15: 83–93. doi:10.1016/0377-8401(86)90015-5
- 944 68. Ravindran V, Tilman ZV, Morel PCH, Ravindran G, Coles GD. Influence of  $\beta$ -glucanase  
945 supplementation on the metabolisable energy and ileal nutrient digestibility of normal  
946 starch and waxy barleys for broiler chickens. *Anim Feed Sci Technol.* 2007;134: 45–55.  
947 doi:10.1016/j.anifeedsci.2006.04.012
- 948 69. Miles RD, Butcher GD, Henry PR, Littell RC. Effect of antibiotic growth promoters on  
949 broiler performance, intestinal growth parameters, and quantitative morphology. *Poult Sci.*  
950 2006;85: 476–485. doi:10.1093/ps/85.3.476
- 951 70. Selber-Hnatiw S, Rukundo B, Ahmadi M, Akoubi H, Al-Bizri H, Aliu AF, et al. Human gut  
952 microbiota: toward an ecology of disease. *Front Microbiol.* 2017;8.  
953 doi:10.3389/fmicb.2017.01265
- 954 71. Donaldson GP, Lee Sm, Mazmanian SK. Gut biogeography of the bacterial microbiota. *Nat*  
955 *Rev Microbiol.* 2016;14: 20–32. doi:http://dx.doi.org/10.1038/nrmicro3552
- 956 72. Croom J, Chichlowski M, Froetschel M, McBride BW, Qui R, Koci MD. The effects of  
957 direct-fed microbial, primalac, or salinomycin supplementation on intestinal lactate isomers  
958 and cecal volatile fatty acid concentrations in broilers. *Int J Poult Sci.* 2009;8: 128–132.
- 959 73. Smirnov A, Perez R, Amit-Romach E, Sklan D, Uni Z. Mucin dynamics and microbial  
960 populations in chicken small intestine are changed by dietary probiotic and antibiotic  
961 growth promoter supplementation. *J Nutr.* 2005;135: 187–192. doi:10.1093/jn/135.2.187
- 962 74. Danzeisen JL, Kim HB, Isaacson RE, Tu ZJ, Johnson TJ. Modulations of the chicken cecal  
963 microbiome and metagenome in response to anticoccidial and growth promoter treatment.  
964 Parkinson J, editor. *PLoS one.* 2011;6: e27949. doi:10.1371/journal.pone.0027949
- 965 75. Cardoso V, Ferreira AP, Costa M, Ponte PIP, Falcão L, Freire JP, et al. Temporal restriction  
966 of enzyme supplementation in barley-based diets has no effect in broiler performance.  
967 *Anim Feed Sci Technol.* 2014;198: 186–195. doi:10.1016/j.anifeedsci.2014.09.007

- 968 76. Rada V, Marounek M. Effect of monensin on the crop microflora of broiler chickens. *Ann*  
969 *Zootech.* 1996;45: 283–288.
- 970 77. Caspary WF. Physiology and pathophysiology of intestinal absorption. *Am J Clin Nutr.*  
971 1992;55: 299S-308S. doi:10.1093/ajcn/55.1.299s
- 972 78. Sukhotnik I, Coran AG, Mogilner JG, Shamian B, Karry R, Lieber M, et al. Leptin affects  
973 intestinal epithelial cell turnover in correlation with leptin receptor expression along the  
974 villus-crypt axis after massive small bowel resection in a rat. *Pediatr. Res.* 2009;66: 648–  
975 653. doi:10.1203/PDR.0b013e3181be9f84
- 976 79. Seno H, Miyoshi H, Brown SL, Geske MJ, Colonna M, Stappenbeck TS. Efficient colonic  
977 mucosal wound repair requires Trem2 signaling. *Proc Natl Acad Sci USA.* 2009;106: 256–  
978 261. doi:10.1073/pnas.0803343106
- 979 80. Kuhn KA, Manieri NA, Liu T-C, Stappenbeck TS. IL-6 stimulates intestinal epithelial  
980 proliferation and repair after injury. *PLoS one.* 2014;9: e114195.  
981 doi:10.1371/journal.pone.0114195
- 982 81. Bamford KB. Chronic gastrointestinal inflammation. *FEMS Immunol Med Microbiol.*  
983 1999;24: 161–168. doi:10.1111/j.1574-695X.1999.tb01277.x
- 984 82. Ward PA, Lentsch AB. The acute inflammatory response and its regulation. *Arch Surg.*  
985 1999;134: 666–669. doi:10.1001/archsurg.134.6.666
- 986 83. Hu Z, Guo Y. Effects of dietary sodium butyrate supplementation on the intestinal  
987 morphological structure, absorptive function and gut flora in chickens. *Anim Feed Sci*  
988 *Technol.* 2007;132: 240–249. doi:10.1016/j.anifeedsci.2006.03.017
- 989 84. Kim MH, Kang SG, Park JH, Yanagisawa M, Kim CH. Short-chain fatty acids activate  
990 GPR41 and GPR43 on intestinal epithelial cells to promote inflammatory responses in  
991 mice. *Gastroenterology.* 2013;145: 396-406.e1–10. doi:10.1053/j.gastro.2013.04.056
- 992 85. Macia L, Tan J, Vieira AT, Leach K, Stanley D, Luong S, et al. Metabolite-sensing  
993 receptors GPR43 and GPR109A facilitate dietary fibre-induced gut homeostasis through  
994 regulation of the inflammasome. *Nat Commun.* 2015;6: 6734. doi:10.1038/ncomms7734
- 995 86. Hume ME, Clemente-Hernández S, Oviedo-Rondón EO. Effects of feed additives and  
996 mixed *Eimeria* species infection on intestinal microbial ecology of broilers. *Poult Sci.*  
997 2006;85: 2106–2111. doi:10.1093/ps/85.12.2106
- 998 87. Macdonald SE, Nolan MJ, Harman K, Boulton K, Hume DA, Tomley FM, et al. Effects of  
999 *Eimeria tenella* infection on chicken caecal microbiome diversity, exploring variation  
1000 associated with severity of pathology. *PLoS one.* 2017;12: e0184890.  
1001 doi:10.1371/journal.pone.0184890

- 1002 88. Leung H, Yitbarek A, Snyder R, Patterson R, Barta JR, Karrow N, et al. Responses of  
1003 broiler chickens to *Eimeria* challenge when fed a nucleotide-rich yeast extract. *Poult Sci.*  
1004 2019;98: 1622–1633. doi:10.3382/ps/pey533
- 1005 89. Apajalahti J. Comparative gut microflora, metabolic challenges, and potential opportunities.  
1006 *J Appl Poult Res.* 2005;14: 444–453. doi:10.1093/japr/14.2.444
- 1007 90. Radu J, Van Dijk C, Wheelhouse RK, Hummanta CA, Gadbois P. Feed and water  
1008 consumption and performance of male and female broilers fed salinomycin and  
1009 maduramicin followed by a withdrawal ration. *Poult Sci.* 1987;66: 1878–1881.  
1010 doi:10.3382/ps.0661878
- 1011 91. Elwinger K, Berndtson E, Engström B, Fossum O, Waldenstedt L. Effect of antibiotic  
1012 growth promoters and anticoccidials on growth of *Clostridium perfringens* in the caeca and  
1013 on performance of broiler chickens. *Acta Vet Scand.* 1998;39: 433–441.
- 1014 92. Dumonceaux TJ, Hill JE, Hemmingsen SM, Van Kessel AG. Characterization of intestinal  
1015 microbiota and response to dietary virginiamycin supplementation in the broiler chicken.  
1016 *Appl Environ Microbiol.* 2006;72: 2815–2823. doi:10.1128/AEM.72.4.2815-2823.2006
- 1017 93. van Der Wielen PW, Biesterveld S, Notermans S, Hofstra H, Urlings BA, van Knapen F.  
1018 Role of volatile fatty acids in development of the cecal microflora in broiler chickens  
1019 during growth. *Appl Environ Microbiol.* 2000;66: 2536–2540. doi:10.1128/aem.66.6.2536-  
1020 2540.2000
- 1021 94. Pourabedin M, Zhao X. Prebiotics and gut microbiota in chickens. *FEMS Microbiol Lett.*  
1022 2015;362. doi:10.1093/femsle/fnv122
- 1023 95. Panda AK, Rao SVR, Raju MVLN, Sunder GS. Effect of butyric acid on performance,  
1024 gastrointestinal tract health and carcass characteristics in broiler chickens. *Asian Australas J*  
1025 *Anim Sci.* 2009;22: 1026–1031. doi:10.5713/ajas.2009.80298
- 1026 96. Wu W, Xiao Z, An W, Dong Y, Zhang B. Dietary sodium butyrate improves intestinal  
1027 development and function by modulating the microbial community in broilers. *PLoS one.*  
1028 2018;13. doi:10.1371/journal.pone.0197762
- 1029 97. Karunaratne ND, Bedford MR, Newkirk RW, Classen HL. Graded levels of hullless barley  
1030 and  $\beta$ -glucanase affect the performance of broiler chickens vaccinated for coccidiosis in an  
1031 age dependent manner. *Poult Sci.* 2017b;96 (E-suppl. 1): 50.

1032

bioRxiv preprint doi: <https://doi.org/10.1101/2020.07.06.189258>; this version posted July 6, 2020. The copyright holder for this preprint (which was not certified by peer review) is the author/funder, who has granted bioRxiv a license to display the preprint in perpetuity. It is made available under aCC-BY 4.0 International license.

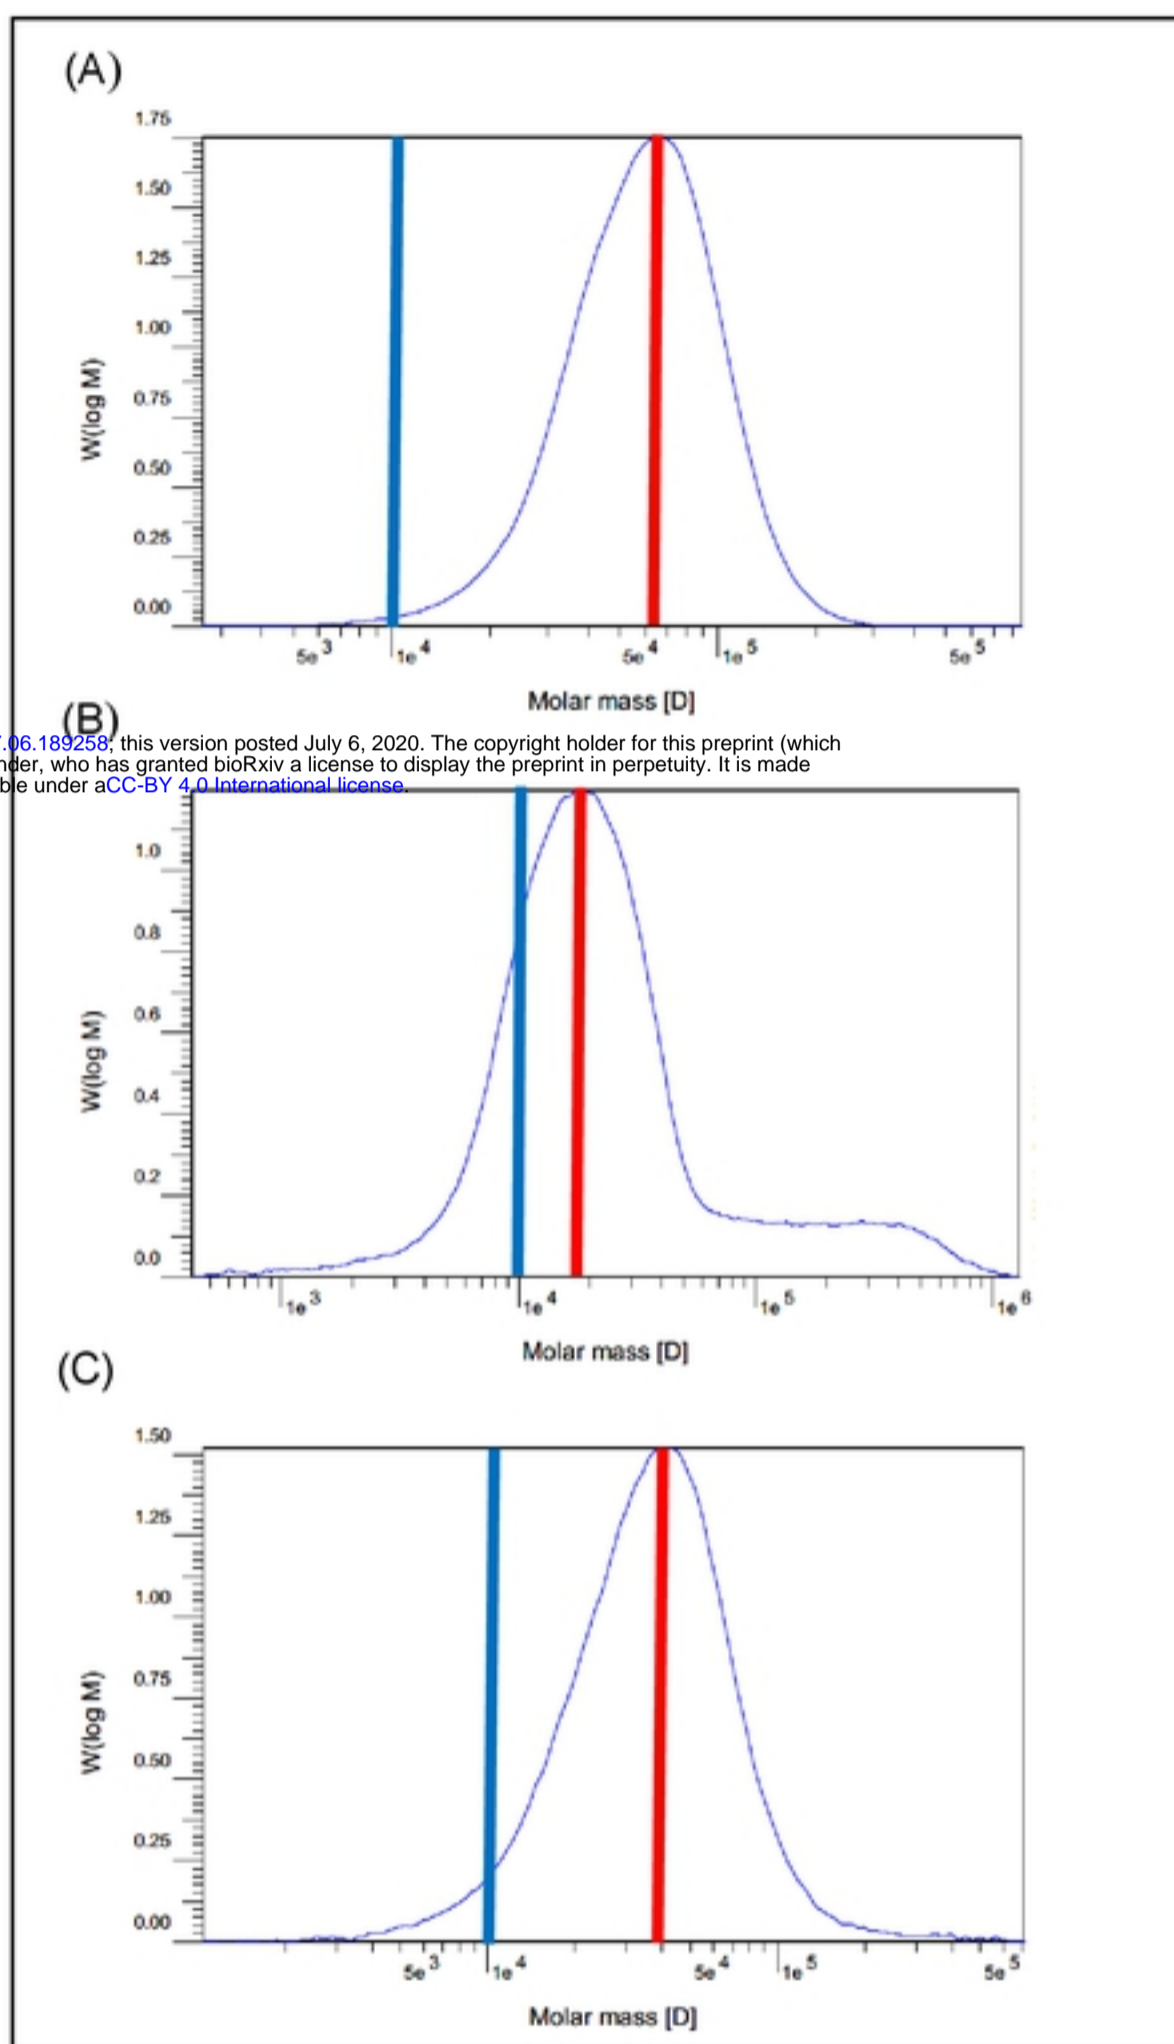

**Figure 1.** Beta-glucan molecular weight distribution in soluble ileal digesta from 11 d broilers fed 60% hullless barley diets in Experiment 2. Blue lines denote point  $10^4$  on the x-axis and red lines indicate the Mp of the distribution curve. (A) Without medication, 0%  $\beta$ -glucanase (B) Without medication, 0.1%  $\beta$ -glucanase (C) With medication, 0%  $\beta$ -glucanase
